# Supplementary material for: Metabarcoding analysis of the stomach contents of the Antarctic Toothfish (Dissostichus mawsoni) collected in the Antarctic Ocean
Source: PeerJ. 2017 Nov 7;5:e3977. doi: 10.7717/peerj.3977 (PMC5680711; doi:10.7717/peerj.3977)
Supplement: Data S2 [file peerj-05-3977-s002.xlsx]

## Sheet: Sheet1
Align No.	Phylum	Accession	GI number	Species name
1	Acanthocepha	AY690565	56699105	Leptorhynchoides thecatus
2	Acanthocepha	JN710452	354983557	Oncicola luehei
3	Acanthocepha	FR856886	407227874	Macracanthorhynchus hirudinaceus
4	Acanthocepha	KC261352	459664330	Mediorhynchus gallinarum
5	Acanthocepha	KJ869251	685506046	Southwellina hispida
6	Acanthocepha	KP697105	782493496	Leucophenga sp.
7	Acoelomorpha / Xenacoelomorpha	AY228758	37910031	Paratomella rubra
8	Acoelomorpha / Xenacoelomorpha	EU710922	189354195	Convolutriloba macropyga
9	Acoelomorpha / Xenacoelomorpha	EU710923	189354197	Convolutriloba longifissura
10	Acoelomorpha / Xenacoelomorpha	EU710924	189354199	Convolutriloba retrogemma
11	Acoelomorpha / Xenacoelomorpha	EU710926	189354203	Convolutriloba hastifera
12	Acoelomorpha / Xenacoelomorpha	HM237350	298289313	Symsagittifera roscoffensis
13	Annelida	AF178678	6049617	Platynereis dumerilii
14	Annelida	AF178680	6934261	Helobdella robusta
15	Annelida	AF342670	19850179	Amphiglena terebro
16	Annelida	AF342672	19850183	Cirratulus sp.
17	Annelida	AF342673	19850185	Dodecaceria sp.
18	Annelida	AF342674	19850187	Trichobranchus sp.
19	Annelida	AF342676	19850189	Amphitritides harpa
20	Annelida	AF342678	19850193	Amphicteis dalmatica
21	Annelida	AF342679	19850195	Rhinothelepus lobatus
22	Annelida	AF342680	19850197	Amaeana trilobata
23	Annelida	AF342681	19850199	Lysilla pacifica
24	Annelida	AF342682	19850201	Pista australis
25	Annelida	AF342683	19850203	Amphitritides sp.
26	Annelida	AF342685	19850207	Loimia ingens
27	Annelida	D50594	22293651	Paraescarpia cf.
28	Annelida	AB073491	27530702	Arcovestia ivanovi
29	Annelida	AY129127	28912827	Seepiophila jonesi
30	Annelida	AY129131	28912835	Escarpia laminata
31	Annelida	AY129134	28912840	Escarpia sp.
32	Annelida	AY129136	28912844	Lamellibrachia cf.
33	Annelida	AY129145	28912862	Lamellibrachia barhami
34	Annelida	AB088670	30578125	Cf. Alaysia
35	Annelida	D50598	30725045	Pogonophora sp.
36	Annelida	AF534828	33330087	Allonais paraguayensis
37	Annelida	AF534829	33330089	Amphichaeta raptisae
38	Annelida	AF534830	33330091	Arcteonais lomondi
39	Annelida	AF534832	33330095	Chaetogaster diaphanus
40	Annelida	AF534834	33330099	Chaetogaster limnaei
41	Annelida	AF534836	33330103	Dero digitata
42	Annelida	AF534838	33330107	Dero obtusa
43	Annelida	AF534839	33330109	Dero vaga
44	Annelida	AF534843	33330117	Nais bretscheri
45	Annelida	AF534844	33330119	Nais variabilis
46	Annelida	AF534845	33330121	Nais communis
47	Annelida	AF534846	33330123	Ophidonais serpentina
48	Annelida	AF534847	33330125	Paranais frici
49	Annelida	AF534849	33330129	Paranais litoralis
50	Annelida	AF534853	33330137	Pristina leidyi
51	Annelida	AF534854	33330139	Pristina longiseta
52	Annelida	AF534855	33330141	Pristina osborni
53	Annelida	AF534856	33330143	Ripistes parasita
54	Annelida	AF534859	33330149	Stylaria fossularis
55	Annelida	AF534862	33330155	Stylaria lacustris
56	Annelida	AF534863	33330157	Vejdovskyella comata
57	Annelida	AF534864	33330159	Branchiura sowerbyi
58	Annelida	AF534865	33330161	Limnodrilus hoffmeisteri
59	Annelida	AF534866	33330163	Tubifex tubifex
60	Annelida	AF534867	33330165	Tubifex sp.
61	Annelida	AY326303	37362158	Escarpia southwardae
62	Annelida	AY436349	39577673	Sabella spallanzanii
63	Annelida	AY519464	41323352	Lumbriculus variegatus
64	Annelida	AY495947	46242854	Hermodice carunculata
65	Annelida	AB181161	48525278	Lamellibrachia sp.
66	Annelida	AY613868	48525563	Mesenchytraeus solifugus
67	Annelida	AY741661	51980079	Clymenella torquata
68	Annelida	AY838866	61652095	Arabella semimaculata
69	Annelida	AY838867	61652097	Diopatra aciculata
70	Annelida	AY838868	61652099	Dorvillea erucaeformis
71	Annelida	AY838869	61652101	Drilonereis longa
72	Annelida	AY838870	61652103	Eunice pennata
73	Annelida	AY838871	61652105	Ninoe nigripes
74	Annelida	AY838872	61652107	Oenone fulgida
75	Annelida	AY838874	61652111	Ophryotrocha labronica
76	Annelida	AY838875	61652113	Paramphinome jeffreysii
77	Annelida	AY961084	61660062	Orbinia latreillii
78	Annelida	AY960799	62199795	Metaphire yuhsii
79	Annelida	AY960800	62199797	Metaphire tahanmonta
80	Annelida	AY960802	62199801	Metaphire paiwanna
81	Annelida	AY960803	62199803	Metaphire glareosa
82	Annelida	AY960804	62199805	Metaphire bununa
83	Annelida	AY960805	62199807	Metaphire nanaoensis
84	Annelida	AY960806	62199809	Metaphire taiwanensis
85	Annelida	AY960807	62199811	Metaphire formosae
86	Annelida	AY960809	62199815	Metaphire feijani
87	Annelida	DQ172704	74145783	Phragmatopoma californica
88	Annelida	DQ209250	78057705	Phyllochaetopterus sp.
89	Annelida	DQ209251	78057707	Mesochaetopterus taylori
90	Annelida	DQ209252	78057709	Chaetopterus sp.
91	Annelida	DQ517436	94481617	Scoloplos cf.
92	Annelida	DQ889681	112434103	Crangonobdella spitzbergensis
93	Annelida	AB264604	118595845	Lamellibrachia juni
94	Annelida	DQ996645	121483450	Lamellibrachia columna
95	Annelida	EF077545	122058494	Amynthas dactilicus
96	Annelida	EF077603	122058610	Aporrectodea trapezoides
97	Annelida	EF077605	122058614	Bimastus parvus
98	Annelida	EF521191	145203375	Siphonosoma australe
99	Annelida	EF494507	146142296	Perionyx excavatus
100	Annelida	EF506562	148791216	Myzostoma seymourcollegiorum
101	Annelida	EF656365	148800193	Urechis unicinctus
102	Annelida	EF583817	155573957	Phascolosoma esculenta
103	Annelida	EU236701	158667991	Terebellides stroemi
104	Annelida	EU239687	158668007	Eclysippe vanelli
105	Annelida	EU239688	158905942	Pista cristata
106	Annelida	EU100087	160425558	Chtonobdella whitmani
107	Annelida	EU100088	160425560	Diestecostoma magna
108	Annelida	EU100089	160425562	Diestecostoma mexicana
109	Annelida	EU100090	160425564	Diestecostoma trujillensis
110	Annelida	EU100092	160425568	Haemopis terrestris
111	Annelida	EU100093	160425570	Hirudo medicinalis
112	Annelida	EU100094	160425572	Idiobdella seychellensis
113	Annelida	EU100095	160425574	Macrobdella decora
114	Annelida	EU100096	160425576	Malagabdella fallax
115	Annelida	EU100097	160425578	Mesobdella gemmata
116	Annelida	EU100098	160425580	Nesophilaemon skottsbergii
117	Annelida	EU100099	160425582	Xerobdella lecomtei
118	Annelida	EU304459	161824406	Whitmania pigra
119	Annelida	EU352317	164429838	Marphysa sanguinea
120	Annelida	EU352318	164429840	Lumbrineris tetraura
121	Annelida	EU223297	164683617	Osedax rubiplumus
122	Annelida	EU223313	164683649	Osedax frankpressi
123	Annelida	FJ214227	209394970	Lumbricus rubellus
124	Annelida	FJ214224	209394994	Dendrobaena attemsi
125	Annelida	FJ214225	209394996	Eisenia lucens
126	Annelida	FJ214226	209394998	Eisenoides carolinensis
127	Annelida	FJ214229	209395000	Eisenia zebra
128	Annelida	FJ374778	209486215	Dendrobaena clujensis
129	Annelida	FJ374779	209486217	Octolasion sp.
130	Annelida	FJ431202	222652168	Osedax sp.
131	Annelida	FJ667531	224384183	Tevnia jerichonana
132	Annelida	FJ667533	224384187	Oasisia sp.
133	Annelida	FJ667536	224384193	Alaysia sp.
134	Annelida	FJ976040	237513534	Pectinaria gouldii
135	Annelida	FJ976041	237513547	Auchenoplax crinita
136	Annelida	FJ612452	237846733	Questa ersei
137	Annelida	FJ975144	238800104	Endomyzostoma sp.
138	Annelida	GQ229122	254036233	Onuphis pseudoiridescens
139	Annelida	FM998075	264684424	Osedax roseus
140	Annelida	FM998111	264684521	Osedax japonicus
141	Annelida	GQ456161	281485685	Diopatra micrura
142	Annelida	GQ456165	281485692	Diopatra marocensis
143	Annelida	AB425818	283549403	Amynthas vittatus
144	Annelida	AB425820	283549405	Metaphire schmardae
145	Annelida	AB482107	283549407	Metaphire megascolidioides
146	Annelida	GU227141	284504801	Cf. Spionidae
147	Annelida	GQ355367	285029336	Chaetogaster diastrophus
148	Annelida	GQ355368	285029338	Dero sp.
149	Annelida	GQ355369	285029340	Nais elinguis
150	Annelida	GQ355373	285029348	Piguetiella michiganensis
151	Annelida	GQ355374	285029350	Pristina aequiseta
152	Annelida	GQ355375	285029352	Slavina appendiculata
153	Annelida	GQ355376	285029354	Specaria josinae
154	Annelida	GQ355378	285029358	Vejdovskyella sp.
155	Annelida	GQ355379	285029360	Monopylephorus rubroniveus
156	Annelida	GU453366	294845823	Achaeta affinis
157	Annelida	GU453367	294845824	Buchholzia appendiculata
158	Annelida	GU453368	294845825	Cernosvitoviella atrata
159	Annelida	GU453369	294845826	Cognettia sphagnetorum
160	Annelida	GU453370	294845828	Enchytraeus albidus
161	Annelida	GU453371	294845829	Fridericia galba
162	Annelida	GU453372	294845830	Henlea nasuta
163	Annelida	GU453373	294845832	Lumbricillus lineatus
164	Annelida	GU453375	294845835	Mesenchytraeus pelicensis
165	Annelida	GQ497522	296885160	Diopatra dentata
166	Annelida	GQ497523	296885162	Paradiopatra quadricuspis
167	Annelida	GQ497524	296885164	Hyalinoecia sp.
168	Annelida	GQ497528	296885172	Eunice rubra
169	Annelida	GQ497529	296885174	Eunice lucei
170	Annelida	GQ497530	296885176	Eunice miurai
171	Annelida	GQ497532	296885180	Eunice antarctica
172	Annelida	GQ497534	296885184	Eunice valens
173	Annelida	GQ497535	296885186	Eunice harassii
174	Annelida	GQ497537	296885190	Eunice cf.
175	Annelida	GQ497540	296885196	Eunice mutilata
176	Annelida	GQ497541	296885198	Eunice norvegica
177	Annelida	GQ497548	296885212	Marphysa brevitentaculata
178	Annelida	GQ497549	296885214	Marphysa disjuncta
179	Annelida	GQ497550	296885216	Marphysa angeli
180	Annelida	GQ497551	296885218	Marphysa cf.
181	Annelida	GQ497552	296885220	Marphysa californica
182	Annelida	GQ497553	296885222	Marphysa viridis
183	Annelida	GQ497554	296885224	Palola cf.
184	Annelida	GQ497555	296885226	Palola sp.
185	Annelida	GQ497556	296885228	Palola viridis
186	Annelida	GQ415480	300792700	Palpiphitime lipovskyae
187	Annelida	GU328642	301507309	Lamprodrilus melanotus
188	Annelida	GU328643	301507311	Lamprodrilus nigrescens
189	Annelida	GU230172	302139903	Antillesoma antillarum
190	Annelida	GU230173	302139905	Phascolosoma scolops
191	Annelida	GU230174	302139907	Phascolosoma stephensoni
192	Annelida	GU230175	302139909	Phascolosoma albolineatum
193	Annelida	HQ224516	311036193	Eisenia sp.
194	Annelida	AB603758	313760467	Hediste japonica
195	Annelida	AB603844	314122011	Hediste atoka
196	Annelida	HQ207188	316927204	Phytobdella meyeri
197	Annelida	AB543182	316996907	Metaphire sp.
198	Annelida	AB543183	316996909	Amynthas yambaruensis
199	Annelida	AB543184	316996911	Amynthas carnosus
200	Annelida	AB543227	316996977	Drawida hattamimizu
201	Annelida	AB543229	316996981	Pontoscolex corethrurus
202	Annelida	AB543231	316996985	Polypheretima taprobanae
203	Annelida	AB543233	316996989	Amynthas robustus
204	Annelida	AB543234	316996991	Metaphire hilgendorfi
205	Annelida	HQ203159	325300965	Chtonobdella bilineata
206	Annelida	HQ203160	325300967	Philaemon sp.
207	Annelida	HQ203161	325300969	Philaemon pungens
208	Annelida	HQ203162	325300971	Neoterrabdella australis
209	Annelida	HQ203165	325300977	Domanibdella sp.
210	Annelida	HQ203166	325300979	Haemadipsa interrupta
211	Annelida	HQ203168	325300983	Haemadipsa cavatuses
212	Annelida	HQ203169	325300985	Haemadipsa limuna
213	Annelida	HQ203170	325300987	Haemadipsa crenata
214	Annelida	HQ203171	325300989	Haemadipsa japonica
215	Annelida	HQ203172	325300991	Haemadipsa trimaculosa
216	Annelida	HQ203174	325300995	Haemadipsa rjukjuana
217	Annelida	HQ203177	325301001	Haemadipsa picta
218	Annelida	HQ203178	325301003	Haemadipsa ornata
219	Annelida	HQ203179	325301005	Haemadipsa sylvestris
220	Annelida	HQ203181	325301009	Haemadipsa zeylanica
221	Annelida	HQ203182	325301011	Haemadipsa montana
222	Annelida	HQ203184	325301015	Philaemon mediorubra
223	Annelida	HQ203185	325301017	Malagabdella niarchosorum
224	Annelida	HQ203186	325301019	Malagabdella vagans
225	Annelida	HQ203187	325301021	Philaemon gloriosi
226	Annelida	HQ203188	325301023	Haemadipsa cochiniana
227	Annelida	HQ203189	325301025	Haemadipsa cf.
228	Annelida	HQ203190	325301027	Philaemon cf.
229	Annelida	HQ203191	325301029	Planobdella sp.
230	Annelida	HQ203192	325301031	Leiobdella sp.
231	Annelida	HQ203194	325301035	Tritetrabdella scandens
232	Annelida	JF509718	340763897	Urechis caupo
233	Annelida	AB596866	341823592	Metaphire sieboldi
234	Annelida	HQ691221	342220110	Dero furcata
235	Annelida	HQ691222	342220112	Lumbricus terrestris
236	Annelida	HQ691223	342220114	Hirudo verbana
237	Annelida	HQ691224	342220116	Aeolosoma sp.
238	Annelida	JN412850	343781511	Hirudinaria javanica
239	Annelida	DQ300106	351637757	Aspidosiphon elegans
240	Annelida	DQ300109	351637759	Aspidosiphon gosnoldi
241	Annelida	DQ300110	351637761	Aspidosiphon gracilis
242	Annelida	DQ300113	351637765	Aspidosiphon muelleri
243	Annelida	DQ300130	351637769	Nephasoma flagriferum
244	Annelida	DQ300133	351637771	Phascolion psammophilus
245	Annelida	DQ300134	351637773	Phascolopsis gouldii
246	Annelida	DQ300141	351637775	Phascolosoma nigrescens
247	Annelida	DQ300156	351637787	Siphonosoma cumanense
248	Annelida	DQ300158	351637789	Siphonosoma vastum
249	Annelida	DQ300165	351637799	Sipunculus phalloides
250	Annelida	JN204269	352263761	Branchiobdella astaci
251	Annelida	AB679654	374429046	Erpobdella japonica
252	Annelida	AB679656	374429049	Gastrostomobdella monticola
253	Annelida	AB679658	374429052	Mimobdella japonica
254	Annelida	AB679664	374429061	Orobdella esulcata
255	Annelida	AB679670	374429070	Orobdella whitmani
256	Annelida	AB679672	374429073	Orobdella ijimai
257	Annelida	AB679676	374429079	Orobdella shimadae
258	Annelida	AB679682	374429088	Orobdella dolichopharynx
259	Annelida	AB679688	374429097	Orobdella koikei
260	Annelida	AB679698	374429112	Orobdella kawakatsuorum
261	Annelida	AB679708	374429127	Orobdella octonaria
262	Annelida	JN865110	378463861	Nephasoma columbaris
263	Annelida	JN865111	378463863	Nephasoma pellucidum
264	Annelida	JN865112	378463865	Themiste minor
265	Annelida	JN865114	378463869	Nephasoma rimicola
266	Annelida	JN865115	378463871	Aspidosiphon laevis
267	Annelida	JN865117	378463875	Aspidosiphon cf.
268	Annelida	JN865118	378463877	Apionsoma misakianum
269	Annelida	JN865124	378463889	Phascolosoma perlucens
270	Annelida	AB592437	383082058	Drawida sp.
271	Annelida	AB596847	383082064	Pithemera bicincta
272	Annelida	AB698864	383871932	Orobdella mononoke
273	Annelida	JQ769509	385724490	Diopatra sp.
274	Annelida	JQ950321	387913613	Diopatra neapolitana
275	Annelida	JQ885939	389620432	Hydroides elegans
276	Annelida	AB704789	399152246	Orobdella ketagalan
277	Annelida	AB685259	407728584	Tritetrabdella taiwana
278	Annelida	JX535232	409108871	Amynthas aspergillus
279	Annelida	JQ310755	409150988	Exallopus jumarsi
280	Annelida	JX119016	410004688	Macellicephala violacea
281	Annelida	AB721481	429476359	Lamellibrachia satsuma
282	Annelida	JX423701	472833098	Amphisamytha fauchaldi
283	Annelida	JX423725	472833146	Amphisamytha galapagensis
284	Annelida	JX423762	472833220	Amphisamytha jacksoni
285	Annelida	KC790350	480540421	Diurodrilus subterraneus
286	Annelida	KC667144	490344891	Hirudo nipponia
287	Annelida	KC688268	494087038	Hirudinaria manillensis
288	Annelida	KC688269	494087054	Whitmania laevis
289	Annelida	KC688270	494087068	Erpobdella octoculata
290	Annelida	KC754378	499167849	Tomopteris sp.
291	Annelida	KF021247	519327808	Amynthas morrisi
292	Annelida	KF425518	546351504	Tonoscolex birmanicus
293	Annelida	KF611806	557637832	Perinereis aibuhitensis
294	Annelida	KF808161	572924146	Glycera unicornis
295	Annelida	KF808170	572924164	Polygordius appendiculatus
296	Annelida	KF808171	572924166	Protodorvillea kefersteini
297	Annelida	KF808172	572924168	Paradoneis sp.
298	Annelida	KF205411	575426630	Amynthas sp.
299	Annelida	KF205966	575427419	Amynthas corticis
300	Annelida	KF205967	575427421	Amynthas octopapillatus
301	Annelida	KF205980	575427445	Metaphire vulgaris
302	Annelida	KF205981	575427447	Metaphire exilis
303	Annelida	KJ183004	590092001	Euclymene oerstedi
304	Annelida	KJ183005	590092003	Clymenura clypeata
305	Annelida	KJ183006	590092005	Sthenelais boa
306	Annelida	AB828569	631782916	Orobdella tsushimensis
307	Annelida	KJ598038	636742962	Osedax crouchi
308	Annelida	KJ598039	636742964	Osedax nordenskjoeldi
309	Annelida	KJ598040	636742966	Osedax rogersi
310	Annelida	KF042443	656465151	Sipunculus norvegicus
311	Annelida	KF042444	656465153	Sipunculus polymyotus
312	Annelida	KF042453	656465171	Sipunculus aff.
313	Annelida	KF042460	656465185	Sipunculus sp.
314	Annelida	KJ754934	662117102	Sipunculus nudus
315	Annelida	KJ789165	675296099	Ridgeia piscesae
316	Annelida	KJ789169	675296113	Siboglinum ekmani
317	Annelida	KJ789167	675296127	Sclerolinum brattstromi
318	Annelida	KJ789161	675296141	Escarpia spicata
319	Annelida	KJ789162	675296155	Galathealinum brachiosum
320	Annelida	KJ789163	675296169	Lamellibrachia luymesi
321	Annelida	KJ789164	675296183	Oasisia alvinae
322	Annelida	KJ789166	675296197	Riftia pachyptila
323	Annelida	KJ789170	675296225	Siboglinum fiordicum
324	Annelida	KJ789171	675296239	Spirobrachia sp.
325	Annelida	KJ825832	675823916	Paraprionospio sp.
326	Annelida	KM042098	685989874	Arenicola marina
327	Annelida	KM042101	685989891	Arenicola defodiens
328	Annelida	KM199288	691192059	Drawida japonica
329	Annelida	KM199289	691192073	Amynthas longisiphonus
330	Annelida	KM083601	691200524	Cirratulus cf.
331	Annelida	AB938004	697993305	Odontobdella blanchardi
332	Annelida	AB938009	697993315	Orobdella masaakikuroiwai
333	Annelida	KM111507	698854121	Tylorrhynchus heterochaetus
334	Annelida	KP119571	735665574	Osedax priapus
335	Annelida	KM095091	745672455	Erpobdella sp.
336	Annelida	KM095094	745672461	Hemiclepsis marginata
337	Annelida	KM095098	745672469	Glossiphonia concolor
338	Annelida	KM095103	745672479	Piscicola sp.
339	Annelida	KM979527	745791752	Ophryotrocha cyclops
340	Annelida	KM823561	747174860	Dendrobaena veneta
341	Annelida	KM655838	758186246	Whitmania acranulata
342	Annelida	KJ806976	763432168	Osedax mucofloris
343	Annelida	AB981654	771839902	Limnatis paluda
344	Annelida	KP867019	814556610	Goniada japonica
345	Annelida	KM000899	822606722	Eisenia spelaea
346	Annelida	KP688581	827022279	Metaphire californica
347	Annelida	KP688582	827022294	Amynthas gracilis
348	Annelida	KP794930	874520339	Cirriformia tentaculata
349	Annelida	KP794932	874520343	Ctenodrilus serratus
350	Annelida	KP794933	874520345	Dodecaceria ater
351	Annelida	KR534502	906849298	Ramisyllis multicaudata
352	Annelida	KR534503	906849312	Trypanosyllis Trypanobia
353	Annelida	KT235957	933940101	Namanereis hummelincki
354	Annelida	LC006114	939319712	Eisenia fetida
355	Annelida	LC006116	939319716	Eisenia andrei
356	Annelida	LC029428	946714116	Salifa motokawai
357	Annelida	KT726958	953768450	Chaetopterus variopedatus
358	Annelida	KT726959	953768464	Magelona mirabilis
359	Annelida	KT726960	953768478	Owenia fusiformis
360	Annelida	KT726962	953768506	Eurythoe complanata
361	Annelida	KT860545	954182092	Osedax deceptionensis
362	Annelida	KT989318	959093780	Glycera dibranchiata
363	Annelida	KT989320	959093808	Glycera capitata
364	Annelida	KT989322	959093822	Hemipodia simplex
365	Annelida	KT989326	959093836	Glycera tesselata
366	Annelida	KT989327	959093850	Glycera cf.
367	Annelida	KT989331	959093878	Glycera tridactyla
368	Annelida	KT989321	961526821	Glycera americana
369	Annelida	KT989325	961526849	Glycinde armigera
370	Annelida	LC087151	974985382	Orobdella naraharaetmagarum
371	Annelida	KT626598	984348829	Metaphire bahli
372	Arthropoda	L14947	294208	Phaenicia sericata
373	Arthropoda	L04272	342501	Anopheles quadrimaculatus
374	Arthropoda	X82503	854400	P.vannanei mRNA
375	Arthropoda	X95575	1185112	C.parallelus mitochondrial
376	Arthropoda	U60990	1438927	Feltia jaculifera
377	Arthropoda	U92670	2231785	Dahlella caldariensis
378	Arthropoda	AF026508	2612965	Drosophila silvestris
379	Arthropoda	AF021182	3831494	Panstrongylus megistus
380	Arthropoda	AF021186	3831500	Triatoma brasiliensis
381	Arthropoda	AF021193	3831509	Triatoma guasayana
382	Arthropoda	AF021199	3831517	Triatoma infestans
383	Arthropoda	AF021202	3831521	Triatoma platensis
384	Arthropoda	AF021206	3831527	Triatoma rubrovaria
385	Arthropoda	AF021210	3831532	Triatoma sordida
386	Arthropoda	AF021219	3831544	Triatoma vitticeps
387	Arthropoda	AF044008	4321295	Papilio zelicaon
388	Arthropoda	AF044009	4321298	Papilio hospiton
389	Arthropoda	AF044010	4321301	Papilio polyxenes
390	Arthropoda	AF044011	4321304	Papilio indra
391	Arthropoda	AF044017	4321322	Papilio troilus
392	Arthropoda	AF044018	4321325	Papilio palamedes
393	Arthropoda	AF044020	4321331	Papilio scamander
394	Arthropoda	AF044021	4321334	Papilio garamas
395	Arthropoda	AF044022	4321337	Eurytides marcellus
396	Arthropoda	AF044023	4321340	Pachliopta neptunus
397	Arthropoda	X84350	4582668	Penaeus notialis
398	Arthropoda	AF137510	4928861	Diastylis sculpta
399	Arthropoda	AF137512	4928865	Oxyurostylis smithi
400	Arthropoda	AF137513	4928867	Oxyurostylis lecroyal
401	Arthropoda	AF137517	4928875	Cyclaspis alba
402	Arthropoda	AF137518	4928877	Cumopsis goodsiri
403	Arthropoda	AF137519	4928879	Iphinoe trispinosa
404	Arthropoda	AF146681	5833432	Pimpla aequalis
405	Arthropoda	AF125381	7106739	Penaeus monodon
406	Arthropoda	AF217843	7243610	Penaeus monodon,
407	Arthropoda	AF132824	7380994	Hyalomma truncatum
408	Arthropoda	AF132825	7380996	Boophilus annulatus
409	Arthropoda	AF132829	7381004	Dermacentor reticulatus
410	Arthropoda	AF132832	7381010	Nosomma monstrosum
411	Arthropoda	AF150756	7542360	Pagurus longicarpus
412	Arthropoda	AF230241	8569243	Cerodontha fasciata
413	Arthropoda	AF200830	8573401	Drosophila mauritiana
414	Arthropoda	AF200832	8573429	Drosophila sechellia
415	Arthropoda	AF200838	8573513	Drosophila simulans
416	Arthropoda	AF260826	8699214	Cochliomyia hominivorax
417	Arthropoda	AF259505	9652004	Cynomyopsis cadaverina
418	Arthropoda	AF259507	9652009	Sarcophaga cooleyi
419	Arthropoda	AF259514	9652023	Blaesoxipha plinthopyga
420	Arthropoda	AF259515	9652025	Peckia chrysostoma
421	Arthropoda	AF259516	9652027	Wohlfahrtia vigil
422	Arthropoda	AF259517	9652029	Brachicoma devia
423	Arthropoda	AF170854	9754689	Macrosoma sp.
424	Arthropoda	AF170855	9754692	Proserpinus clarkiae
425	Arthropoda	AF170856	9754695	Hemileuca electra
426	Arthropoda	AF170859	9754704	Hylephila phyleus
427	Arthropoda	AF170862	9754713	Boloria epithone
428	Arthropoda	AF170863	9754716	Apodemia mormo
429	Arthropoda	AF170866	9754725	Baronia brevicornis
430	Arthropoda	AF170869	9754734	Allancastria cerisyi
431	Arthropoda	AF170873	9754746	Iphiclides podalirius
432	Arthropoda	AF170877	9754758	Parides photinus
433	Arthropoda	AF276842	9799532	Phytomyza vomitoriae
434	Arthropoda	AF276850	9799556	Phytomyza verticillatae
435	Arthropoda	AF276851	9799559	Phytomyza nemopanthi
436	Arthropoda	AF276865	9799601	Phytomyza n.
437	Arthropoda	AF276866	9799604	Phytomyza opacae
438	Arthropoda	AF267466	10443930	Essostrutha laevis
439	Arthropoda	AF267467	10443932	Phaea maryannae
440	Arthropoda	AF267468	10443934	Phaea mirabilis
441	Arthropoda	AF267469	10443936	Phaea biplagiata
442	Arthropoda	AF267470	10443938	Phaea vittata
443	Arthropoda	AF267472	10443942	Tetraopes umbonatus
444	Arthropoda	AF267473	10443944	Tetraopes melanurus
445	Arthropoda	AF267474	10443946	Tetraopes quinquemaculatus
446	Arthropoda	AF267475	10443948	Tetraopes texanus
447	Arthropoda	AF267476	10443950	Tetraopes annulatus
448	Arthropoda	AF267477	10443952	Tetraopes pilosus
449	Arthropoda	AF267479	10443956	Tetraopes mandibularis
450	Arthropoda	AF267480	10443958	Tetraopes basalis
451	Arthropoda	AF267481	10443960	Tetraopes femoratus
452	Arthropoda	AF267482	10443962	Tetraopes sublaevis
453	Arthropoda	AF267483	10443964	Tetraopes varicornis
454	Arthropoda	AF301594	11139100	Triatoma dimidiata
455	Arthropoda	AF295562	11321178	Chrysomya semimetallica
456	Arthropoda	AF295549	11321184	Compsomyiops callipes
457	Arthropoda	AF295552	11321193	Chrysomya norrisi
458	Arthropoda	AF295556	11321205	Chrysomya varipes
459	Arthropoda	AF295557	11321208	Eucalliphora latifrons
460	Arthropoda	AF295559	11321214	Protocalliphora sialia
461	Arthropoda	AY012689	11878381	Ovobathysciola gestroi
462	Arthropoda	AY012690	11878383	Ovobathysciola grafittii
463	Arthropoda	AY012691	11878385	Ovobathysciola sp.
464	Arthropoda	AY012692	11878387	Patriziella sardoa
465	Arthropoda	AY012693	11878389	Patriziella nuragica
466	Arthropoda	AY012695	11878393	Speonomus delarouzei
467	Arthropoda	AY012697	11878395	Speonomus hygrophilus
468	Arthropoda	AY012698	11878397	Speonomus lostiai
469	Arthropoda	AY012688	11878399	Ovobathysciola majori
470	Arthropoda	AY012696	11878401	Speonomus bruckii
471	Arthropoda	AB047565	11994824	Leptocarabus arboreus
472	Arthropoda	AB047568	11994830	Leptocarabus procerulus
473	Arthropoda	AB047569	11994832	Carabus kumagaii
474	Arthropoda	AB047570	11994834	Leptocarabus kumagaii
475	Arthropoda	AB047572	11994838	Leptocarabus hiurai
476	Arthropoda	AB047577	11994848	Leptocarabus kyushuensis
477	Arthropoda	AF270939	12328587	Heterodoxus macropus
478	Arthropoda	AF200375	12641941	Ceratosolen bisulcatus
479	Arthropoda	AF200378	12641949	Ceratosolen emarginatus
480	Arthropoda	AF200381	12641957	Ceratosolen medlerianus
481	Arthropoda	AF200387	12641972	Ceratosolen dentifer
482	Arthropoda	AF200388	12641975	Ceratosolen hooglandi
483	Arthropoda	AF200390	12641981	Ceratosolen abnormis
484	Arthropoda	AF200391	12641984	Ceratosolen armipes
485	Arthropoda	AF200392	12641987	Ceratosolen kaironkensis
486	Arthropoda	AF200404	12642020	Liporrhopalum virgatae
487	Arthropoda	AF200408	12642031	Pleistodontes rieki
488	Arthropoda	AF200409	12642034	Pleistodontes rigisamos
489	Arthropoda	AF200410	12642037	Waterstoniella brevigena
490	Arthropoda	AF200412	12642041	Wiebesia brusi
491	Arthropoda	AF200414	12642047	Wiebesia punctatae
492	Arthropoda	AJ293040	13161462	Aleochara clavicornis
493	Arthropoda	AJ293045	13161474	Aleochara cf.
494	Arthropoda	AJ293049	13161477	Aleochara haematoptera
495	Arthropoda	AJ293050	13161480	Aleochara brevipennis
496	Arthropoda	AJ293054	13161486	Aleochara intricata
497	Arthropoda	AJ293060	13161489	Aleochara funebris
498	Arthropoda	AJ293062	13161492	Aleochara grisea
499	Arthropoda	AJ293066	13161495	Aleochara depressa
500	Arthropoda	AJ293067	13161498	Aleochara inconspicua
501	Arthropoda	AJ293069	13161501	Aleochara castaneipennis
502	Arthropoda	AJ293073	13161504	Aleochara curtidens
503	Arthropoda	AJ293083	13161507	Aleochara bipustulata
504	Arthropoda	AJ293087	13161513	Aleochara bilineata
505	Arthropoda	AJ293089	13161516	Aleochara bisolata
506	Arthropoda	AJ293090	13161519	Aleochara binotata
507	Arthropoda	AJ293094	13161522	Aleochara bimaculata
508	Arthropoda	AJ293038	13161781	Hoplandria lateralis
509	Arthropoda	AJ293044	13161784	Aleochara lustrica
510	Arthropoda	AJ293046	13161787	Aleochara lata
511	Arthropoda	AJ293048	13161793	Aleochara laticornis
512	Arthropoda	AJ293053	13161799	Aleochara marginipennis
513	Arthropoda	AJ293055	13161802	Aleochara oxypodia
514	Arthropoda	AJ293057	13161805	Aleochara villosa
515	Arthropoda	AJ293061	13161811	Aleochara rubricalis
516	Arthropoda	AJ293063	13161814	Aleochara punctatella
517	Arthropoda	AJ293064	13161817	Aleochara spadicea
518	Arthropoda	AJ293065	13161820	Aleochara valida
519	Arthropoda	AJ293072	13161829	Aleochara pacifica
520	Arthropoda	AJ293074	13161832	Aleochara trisulcata
521	Arthropoda	AJ293075	13161835	Aleochara moesta
522	Arthropoda	AJ293077	13161841	Aleochara milleri
523	Arthropoda	AJ293078	13161844	Aleochara tristis
524	Arthropoda	AJ293079	13161847	Aleochara mahagi
525	Arthropoda	AJ293080	13161850	Aleochara trivialis
526	Arthropoda	AJ293081	13161853	Aleochara morion
527	Arthropoda	AJ293082	13161856	Aleochara lanuginosa
528	Arthropoda	AJ293084	13161859	Aleochara verna
529	Arthropoda	AJ293093	13161868	Aleochara notula
530	Arthropoda	AJ293031	13161921	Tachyporus formosus
531	Arthropoda	AJ293036	13161924	Oxypoda longipes
532	Arthropoda	AJ293039	13161930	Hoplandriini sp.
533	Arthropoda	AJ293034	13161951	Zyras haworthi
534	Arthropoda	AJ293056	13162191	Aleochara transvaalensis
535	Arthropoda	AJ293058	13162194	Aleochara sparsa
536	Arthropoda	AJ293068	13169439	Aleochara heeri
537	Arthropoda	AF352298	13591794	Diastylis crenellata
538	Arthropoda	AF375314	14211301	Sinophloeus porteri
539	Arthropoda	AF375328	14211329	Pseudochramesus acuteclavatus
540	Arthropoda	AF395176	15004665	Andricus kollari
541	Arthropoda	AF395178	15004669	Plagiotrochus quercusilicis
542	Arthropoda	AF395179	15004671	Barbotinia oraniensis
543	Arthropoda	AB002173	15076368	Henosepilachna enneasticta
544	Arthropoda	AB002176	15076374	Henosepilachna septima
545	Arthropoda	AB002178	15076378	Epilachna admirabilis
546	Arthropoda	AB002179	15076380	Epilachna sp.
547	Arthropoda	AB002181	15076384	Henosepilachna vigintioctopunctata
548	Arthropoda	AB002194	15076410	Henosepilachna vigintioctomaculata
549	Arthropoda	AB002223	15076468	Henosepilachna niponica
550	Arthropoda	AB002229	15076480	Henosepilachna yasutomii
551	Arthropoda	AF284431	15076876	Penaeus indicus
552	Arthropoda	AF284432	15076878	Penaeus merguiensis
553	Arthropoda	AJ270997	15626317	Lithobius forficatus
554	Arthropoda	AY008680	15808088	Boophilus geigyi
555	Arthropoda	AF425840	16566509	Sabethes cyaneus
556	Arthropoda	AF425841	16566510	Cnephia dacotensis
557	Arthropoda	AF425842	16566511	Chaoborus sp.
558	Arthropoda	AF425843	16566512	Anopheles earlei
559	Arthropoda	AF425844	16566513	Anopheles stephensi
560	Arthropoda	AF425845	16566514	Ochlerotatus atropalpus
561	Arthropoda	AF425847	16566516	Culex tarsalis
562	Arthropoda	AF425848	16566517	Culiseta impatiens
563	Arthropoda	AY040285	16753179	Araucarius major
564	Arthropoda	AY040289	16753183	Hylurdrectonus araucariae
565	Arthropoda	AY040290	16753185	Hylurdrectonus pinarius
566	Arthropoda	AF425321	16798356	Clibanarius albidigitus
567	Arthropoda	AF436034	16923858	Aegla uruguayana
568	Arthropoda	AJ420365	17066253	Diachrysia chrysitis
569	Arthropoda	AY055727	18026241	Narceus annularus
570	Arthropoda	AY055728	18026255	Thyropygus sp.
571	Arthropoda	AF467886	18308205	Crioceris duodecimpunctata
572	Arthropoda	AF466700	18496843	Celuca pugilator
573	Arthropoda	AY074901	19879593	Lucilia adisoemartoi
574	Arthropoda	AY074902	19879596	Dyscritomyia fasciata
575	Arthropoda	AY074903	19879599	Dyscritomyia lucilioides
576	Arthropoda	AF449137	20378662	Rhodnius neivai
577	Arthropoda	AF449138	20378664	Rhodnius prolixus
578	Arthropoda	AF449139	20378666	Triatoma maculata
579	Arthropoda	AF449140	20378668	Eratyrus mucronatus
580	Arthropoda	AF449141	20378670	Panstrongylus herreri
581	Arthropoda	AF452048	21311420	Pyrocoelia rufa
582	Arthropoda	AF061781	21326565	Hemilamprops californicus
583	Arthropoda	AF395115	21666425	Fenneropenaeus sp.
584	Arthropoda	AB071201	23095914	Panulirus japonicus
585	Arthropoda	AF187785	23336915	Phyciodes mylitta
586	Arthropoda	AF187789	23336917	Phyciodes orseis
587	Arthropoda	AY127703	23429226	Macrotermes muelleri
588	Arthropoda	AY127705	23429230	Macrotermes nobilis
589	Arthropoda	AY127706	23429232	Protermes minutus
590	Arthropoda	AY127708	23429236	Macrotermes subhyalinus
591	Arthropoda	AY127710	23429240	Odontotermes silvicolus
592	Arthropoda	AY127714	23429248	Odontotermes latericius
593	Arthropoda	AY127717	23429254	Odontotermes nilensis
594	Arthropoda	AY127718	23429256	Amitermes evuncifer
595	Arthropoda	AY127719	23429258	Cubitermes sp.
596	Arthropoda	AY127720	23429260	Coptotermes sjostedti
597	Arthropoda	AY127722	23429264	Nasutitermes latifrons
598	Arthropoda	AY127725	23429270	Sphaerotermes sphaerothorax
599	Arthropoda	AY127726	23429272	Synacanthotermes heterodon
600	Arthropoda	AY127727	23429274	Astalotermes quietus
601	Arthropoda	AY127729	23429278	Protermes prorepens
602	Arthropoda	AY127731	23429282	Pseudacanthotermes militaris
603	Arthropoda	AY127733	23429286	Ancistrotermes crucifer
604	Arthropoda	AY127734	23429288	Macrotermes lilljeborgi
605	Arthropoda	AY127737	23429294	Foraminitermes valens
606	Arthropoda	AY127738	23429296	Odontotermes minutus
607	Arthropoda	AY127742	23429304	Hypotermes xenotermitis
608	Arthropoda	AY127744	23429308	Odontotermes billitoni
609	Arthropoda	AY127745	23429310	Labritermes butelreepeni
610	Arthropoda	AY127747	23429314	Macrotermes ahmadi
611	Arthropoda	AY127748	23429316	Macrotermes malaccensis
612	Arthropoda	AB073725	24430370	Ixodes persulcatus
613	Arthropoda	AB095226	24636701	Carabus albrechti
614	Arthropoda	AB095230	24636709	Carabus lewisianus
615	Arthropoda	AB095233	24636715	Carabus kimurai
616	Arthropoda	AB095243	24636735	Carabus yamato
617	Arthropoda	AB095262	24636773	Carabus japonicus
618	Arthropoda	AB095263	24636775	Carabus dehaanii
619	Arthropoda	AF335993	24762254	Thrips imaginis
620	Arthropoda	AF474346	25271634	Orconectes bisectus
621	Arthropoda	AF474347	25271636	Orconectes burri
622	Arthropoda	AF474348	25271638	Orconectes durelli
623	Arthropoda	AF474349	25271640	Orconectes eupunctus
624	Arthropoda	AF474351	25271644	Orconectes jeffersoni
625	Arthropoda	AF474352	25271646	Orconectes juvenilis
626	Arthropoda	AF474353	25271648	Orconectes marchandi
627	Arthropoda	AF474355	25271652	Orconectes obscurus
628	Arthropoda	AF474356	25271654	Orconectes placidus
629	Arthropoda	AF474357	25271656	Orconectes propinquus
630	Arthropoda	AF474358	25271658	Orconectes rafinesquei
631	Arthropoda	AF474359	25271660	Orconectes sanbornii
632	Arthropoda	AF474361	25271664	Orconectes stannardi
633	Arthropoda	AF474362	25271666	Orconectes sp.
634	Arthropoda	AF474363	25271668	Orconectes tricuspis
635	Arthropoda	AF474364	25271670	Orconectes virginiensis
636	Arthropoda	AF474367	25271676	Orconectes shoupi
637	Arthropoda	AF474368	25271678	Orconectes erichsonianus
638	Arthropoda	AF474369	25271680	Orconectes kentuckiensis
639	Arthropoda	AY154400	25989932	Drosophila quinaria
640	Arthropoda	AY156600	26891812	Phyciodes batesii
641	Arthropoda	AY156607	26891826	Phyciodes cocyta
642	Arthropoda	AY156637	26891886	Phyciodes pallida
643	Arthropoda	AY156645	26891902	Phyciodes pulchella
644	Arthropoda	AY156685	26891982	Phyciodes vesta
645	Arthropoda	AJ437071	27368701	Hyalomma dromedarii
646	Arthropoda	AJ437098	27368755	Hyalomma marginatum
647	Arthropoda	AF277437	28208307	Empyreuma pugione
648	Arthropoda	AF277443	28208319	Eucereon consorta
649	Arthropoda	AF277445	28208323	Hyalaceria gigantea
650	Arthropoda	AF513072	28626205	Empyreuma affinis
651	Arthropoda	AB105073	28971713	Plectrura metallica
652	Arthropoda	AY191994	29377775	Tricholepidion gertschi
653	Arthropoda	AY256968	30525644	Scopelocheirus schellenbergi
654	Arthropoda	AJ556909	30577779	Phauda bicolor
655	Arthropoda	AY280598	30692461	Myrmica microrubra
656	Arthropoda	AB109806	30724906	Scaphinotus viridis
657	Arthropoda	AB109807	30724908	Scaphinotus viduus
658	Arthropoda	AB109808	30724910	Scaphinotus bilobus
659	Arthropoda	AB109809	30724912	Scaphinotus ridingsii
660	Arthropoda	AB109810	30724914	Scaphinotus valentini
661	Arthropoda	AB109811	30724916	Scaphinotus andrewsii
662	Arthropoda	AB109813	30724920	Scaphinotus behrensi
663	Arthropoda	AB109814	30724922	Scaphinotus labontei
664	Arthropoda	AB109815	30724924	Scaphinotus marginatus
665	Arthropoda	AB109816	30724926	Scaphinotus interruptus
666	Arthropoda	AB109817	30724928	Scaphinotus velutinus
667	Arthropoda	AB109818	30724930	Scaphinotus angusticollis
668	Arthropoda	AB109822	30724938	Cychrus brezinai
669	Arthropoda	AB109823	30724940	Cychropsis draconis
670	Arthropoda	AB109824	30724942	Cychrus tuberculatus
671	Arthropoda	AB109826	30724946	Cychrus morawitzi
672	Arthropoda	AB109829	30724952	Cychrus ponticus
673	Arthropoda	AB109834	30724962	Cychrus aeneus
674	Arthropoda	AB109836	30724966	Cychrus bispinosus
675	Arthropoda	AB109837	30724968	Cychrus caraboides
676	Arthropoda	AB109839	30724972	Cychrus okamotoi
677	Arthropoda	AB109840	30724974	Cychrus minshanicola
678	Arthropoda	AB109842	30724978	Cychrus thibetanus
679	Arthropoda	AB109844	30724982	Cychrus chareti
680	Arthropoda	AB109845	30724984	Cychrus kralianus
681	Arthropoda	AB109846	30724986	Cychrus zhoui
682	Arthropoda	AB109847	30724988	Cychrus businskyorum
683	Arthropoda	AB109848	30724990	Cychrus koiwayai
684	Arthropoda	AB109852	30724998	Cychrus stoetzneri
685	Arthropoda	AB109853	30725000	Cychrus furumii
686	Arthropoda	AB109855	30725004	Cychrus kaznakovi
687	Arthropoda	AB109856	30725006	Ceroglossus speciosus
688	Arthropoda	AB109857	30725008	Ceroglossus darwini
689	Arthropoda	AB109858	30725010	Ceroglossus chilensis
690	Arthropoda	AB109859	30725012	Ceroglossus suturalis
691	Arthropoda	AB109860	30725014	Ceroglossus buqueti
692	Arthropoda	AJ536172	30962148	Meligethes aeneus
693	Arthropoda	AF335994	31126989	Lepidopsocid RS-2001
694	Arthropoda	AB093006	32562860	Portunus trituberculatus
695	Arthropoda	AY131096	33383481	Apion sp.
696	Arthropoda	AY131099	33383487	Sitophilus oryzae
697	Arthropoda	AY131101	33383491	Sitophilus granarius
698	Arthropoda	AY131102	33383493	Sitophilus linearis
699	Arthropoda	AY131113	33383515	Rhynchophorus cruentatus
700	Arthropoda	AY131121	33383531	Rhynchophorus palmarum
701	Arthropoda	AY346451	33667903	Lucilia hainanensis
702	Arthropoda	AY368909	34871801	Synergus crassicornis
703	Arthropoda	AY368910	34871803	Ceroptres cerri
704	Arthropoda	AY368917	34871817	Antistrophus silphii
705	Arthropoda	AY368920	34871823	Neaylax verbenacus
706	Arthropoda	AY368921	34871825	Isocolus rogenhoferi
707	Arthropoda	AY368922	34871827	Aulacidea tragopogonis
708	Arthropoda	AY368925	34871833	Timaspis phoenixopodos
709	Arthropoda	AY368927	34871837	Phanacis centaureae
710	Arthropoda	AY368929	34871841	Pediaspis aceris
711	Arthropoda	AY368930	34871843	Neuroterus numismalis
712	Arthropoda	AY368931	34871845	Biorhiza pallida
713	Arthropoda	AY368932	34871847	Parnips nigripes
714	Arthropoda	AY368933	34871849	Paramblynotus virginianus
715	Arthropoda	AY423064	37594483	Eteobalea intermediella
716	Arthropoda	AY423065	37594486	Eteobalea serratella
717	Arthropoda	AY396143	37693051	Lepidostoma flavum
718	Arthropoda	AY396145	37693057	Apsilochorema unculatum
719	Arthropoda	AY333886	37889876	Cotesia melitaearum
720	Arthropoda	AY333888	37889880	Cotesia koebelei
721	Arthropoda	AY227076	37954997	Forda riccobonii
722	Arthropoda	AY227078	37955001	Smynthurodes betae
723	Arthropoda	AY227079	37955003	Baizongia pistaciae
724	Arthropoda	AY227080	37955006	Geoica sp.
725	Arthropoda	AY278317	37957983	Pachypsylla venusta
726	Arthropoda	AB114300	40363499	Vargula hilgendorfii
727	Arthropoda	AY490798	40456401	Apsilochorema hwangi
728	Arthropoda	AY490799	40456404	Lepidostoma fui
729	Arthropoda	AY531391	41352298	Schizaphis graminum
730	Arthropoda	AY456186	41352316	Armillifer armillatus
731	Arthropoda	AY456187	41352330	Argulus americanus
732	Arthropoda	AY456189	41352358	Hutchinsoniella macracantha
733	Arthropoda	AY456190	41352372	Speleonectes tulumensis
734	Arthropoda	AY457576	42405477	Papilio hipponous
735	Arthropoda	AY457578	42405483	Papilio memnon
736	Arthropoda	AY457583	42405498	Papilio aegeus
737	Arthropoda	AY457589	42405516	Papilio epiphorbas
738	Arthropoda	AY457596	42405537	Papilio birchalli
739	Arthropoda	AY457601	42405552	Papilio thoas
740	Arthropoda	AY457602	42405555	Papilio torquatus
741	Arthropoda	AY457170	42539974	Achelia bituberculata
742	Arthropoda	AY536736	44194111	Lepidostoma arcuatum
743	Arthropoda	AY536737	44194114	Paraphlegopteryx morsei
744	Arthropoda	AY521251	45826225	Aleurodicus dugesii
745	Arthropoda	AY541127	46948554	Drosophila falleni
746	Arthropoda	AY541209	46948718	Drosophila innubila
747	Arthropoda	AB091772	47457831	Eucalanus bungii
748	Arthropoda	AY630340	47933676	Philaenus spumarius
749	Arthropoda	AY252904	48256261	Gerris marginatus
750	Arthropoda	AY252906	48256265	Jalysus spinosus
751	Arthropoda	AY252907	48256267	Graphocephala coccinea
752	Arthropoda	AY252909	48256270	Lygus lineolaris
753	Arthropoda	AY252913	48256278	Belostoma flumineum
754	Arthropoda	AY252914	48256280	Neortholomus scolopax
755	Arthropoda	AY252915	48256282	Anasa sp.
756	Arthropoda	AY252916	48256284	Anasa tristis
757	Arthropoda	AY252918	48256287	Brochymena sp.
758	Arthropoda	AY252921	48256292	Semium hirtum
759	Arthropoda	AY252924	48256297	Baclozygum brachypterum
760	Arthropoda	AY252925	48256299	Lestonia haustorifera
761	Arthropoda	AY252929	48256305	Oxycarenus sp.
762	Arthropoda	AY252938	48256318	Wallabicoris sp.
763	Arthropoda	AY252942	48256324	Usingerina moapensis
764	Arthropoda	AY252943	48256326	Laryngodus sp.
765	Arthropoda	AY252945	48256329	Liorhyssus sp.
766	Arthropoda	AY252948	48256334	Tessaratoma papillosa
767	Arthropoda	AY252950	48256338	Ischnodemus sp.
768	Arthropoda	AY252951	48256339	Joppeicus paradoxus
769	Arthropoda	AY252952	48256340	Urostylis westwoodi
770	Arthropoda	AY252966	48256367	Dysdercus sp.
771	Arthropoda	AY252967	48256369	Largus sp.
772	Arthropoda	AY252968	48256371	Stenomacra sp.
773	Arthropoda	AY252969	48256373	Canopus sp.
774	Arthropoda	AY252970	48256375	Pselliopus coccinea
775	Arthropoda	AY252971	48256377	Metrobates sp.
776	Arthropoda	AY252972	48256379	Clastoptera sp.
777	Arthropoda	AY252975	48256384	Plagiognathus chrysanthemi
778	Arthropoda	AY252977	48256386	Capsus ater
779	Arthropoda	AY252978	48256388	Monalocoris americanus
780	Arthropoda	AY252980	48256391	Stenotus binotatus
781	Arthropoda	AY252982	48256394	Amblytylus nasutus
782	Arthropoda	AY252983	48256396	Leptopterna dolobrata
783	Arthropoda	AY252985	48256400	Parthenicus sp.
784	Arthropoda	AY252986	48256402	Dichrooscytus sp.
785	Arthropoda	AY252988	48256406	Pilophorus gracilis
786	Arthropoda	AY252989	48256408	Deraeocoris sp.
787	Arthropoda	AY252990	48256410	Phytocoris sp.
788	Arthropoda	AY252991	48256412	Eurynysius sp.
789	Arthropoda	AY252992	48256414	Mcateella sp.
790	Arthropoda	AY252993	48256416	Cletus sp.
791	Arthropoda	AY252994	48256418	Udeocoris nigroaeneus
792	Arthropoda	AY252995	48256420	Remaudiereana inornata
793	Arthropoda	AY252996	48256421	Cymus sp.
794	Arthropoda	AY252999	48256425	Eupolemus sp.
795	Arthropoda	AY253000	48256427	Stauralia chloracantha
796	Arthropoda	AY253001	48256429	Stauralia compuncta
797	Arthropoda	AY253002	48256431	Amphaces sp.
798	Arthropoda	AY253003	48256433	Anischys luteovarius
799	Arthropoda	AY253004	48256435	Austrotechus rugosus
800	Arthropoda	AY253005	48256437	Coleotichus costatus
801	Arthropoda	AY253006	48256439	Choerocoris variegatus
802	Arthropoda	AY253007	48256441	Hypogomphus sp.
803	Arthropoda	AY253008	48256443	Tholosanus sp.
804	Arthropoda	AY253009	48256444	Nerthra adspersa
805	Arthropoda	AY253010	48256446	Megochterus occidentalis
806	Arthropoda	AY253011	48256448	Cimex lectularius
807	Arthropoda	AY253012	48256449	Plagiognathus politus
808	Arthropoda	AY253014	48256453	Parthenicus juniperi
809	Arthropoda	AY253015	48256455	Pilophorus uhleri
810	Arthropoda	AY253016	48256457	Psallovius sp.
811	Arthropoda	AY253017	48256459	Phlegyas abbreviatus
812	Arthropoda	AY253018	48256461	Paraulacizes irrorata
813	Arthropoda	AY253019	48256463	Adelphocoris lineolatus
814	Arthropoda	AY253020	48256465	Europiella artemisiae
815	Arthropoda	AY253023	48256471	Slaterocoris sp.
816	Arthropoda	AY253024	48256473	Psallovius piceicola
817	Arthropoda	AY253025	48256475	Pilophorus piceicola
818	Arthropoda	AY253026	48256477	Scotomedes sp.
819	Arthropoda	AY253027	48256479	Cylapus sp.
820	Arthropoda	AY253029	48256483	Ceratocombus australiensis
821	Arthropoda	AY253030	48256485	Cryptostemma sp.
822	Arthropoda	AY253031	48256487	Pateena polymitarior
823	Arthropoda	AY253032	48256489	Pateena elimata
824	Arthropoda	AY253033	48256491	Hypselosoma hickmani
825	Arthropoda	AY253035	48256495	Rhinacloa forticornis
826	Arthropoda	AY253036	48256497	Oncerometopus sp.
827	Arthropoda	AY253037	48256499	Parthenicus covilleae
828	Arthropoda	AY253038	48256500	Lygus elisus
829	Arthropoda	AY253039	48256501	Macrocephalus sp.
830	Arthropoda	AY253041	48256504	Megalopsallus froeschneri
831	Arthropoda	AY253042	48256505	Megalopsallus pallipes
832	Arthropoda	AY253043	48256507	Phytocoris becki
833	Arthropoda	AY253044	48256509	Lopidea sp.
834	Arthropoda	AY253045	48256510	Campyloneura virgula
835	Arthropoda	AY253048	48256514	Elasmostethus sp.
836	Arthropoda	AY253050	48256518	Neurocolpus arizonae
837	Arthropoda	AY253052	48256521	Knightomiris distinctus
838	Arthropoda	AY253054	48256523	Proba sp.
839	Arthropoda	AY253056	48256527	Tupiocoris sp.
840	Arthropoda	AY253057	48256529	Plagiognathus sp.
841	Arthropoda	AY253058	48256530	Megalopsallus sparsus
842	Arthropoda	AY253059	48256532	Phymatopsallus sp.
843	Arthropoda	AY253063	48256538	Larinocerus balius
844	Arthropoda	AY253064	48256540	Phytocoris vanduzeei
845	Arthropoda	AY253065	48256542	Phytocoris ramosus
846	Arthropoda	AY253068	48256548	Megalopsallus humeralis
847	Arthropoda	AY253069	48256550	Phyllopidea picta
848	Arthropoda	AY253070	48256552	Tuxedo sp.
849	Arthropoda	AY253071	48256554	Chlamydatus becki
850	Arthropoda	AY253072	48256556	Oligotylus ceanothi
851	Arthropoda	AY253073	48256557	Oligotylus cercocarpicola
852	Arthropoda	AY253074	48256559	Irbisia brachycera
853	Arthropoda	AY253075	48256560	Pycnocoris sp.
854	Arthropoda	AY253077	48256564	Ectopiocerus anthracinus
855	Arthropoda	AY253079	48256567	Teleorhinus sp.
856	Arthropoda	AY253081	48256570	Oligotylus purshiae
857	Arthropoda	AY253082	48256572	Irbisia pacifica
858	Arthropoda	AY253083	48256574	Pilophorus discretus
859	Arthropoda	AY253084	48256576	Aoplonema sp.
860	Arthropoda	AY253085	48256578	Slaterocoris croceipes
861	Arthropoda	AY253086	48256580	Deraeocoris brevis
862	Arthropoda	AY253088	48256583	Atractotomus acaciae
863	Arthropoda	AY253090	48256587	Lopidea robiniae
864	Arthropoda	AY253092	48256590	Melanotrichus sp.
865	Arthropoda	AY253093	48256592	Saileria bella
866	Arthropoda	AY253095	48256596	Deraeocoris mutatus
867	Arthropoda	AY253096	48256598	Oligotylus carneatus
868	Arthropoda	AY253099	48256604	Pycnocoris ursinus
869	Arthropoda	AY253101	48256608	Criocoris saliens
870	Arthropoda	AY253102	48256610	Pilophorus sp.
871	Arthropoda	AY253103	48256612	Brooksetta sp.
872	Arthropoda	AY253104	48256614	Cyphopelta modesta
873	Arthropoda	AY253105	48256616	Polymerus sp.
874	Arthropoda	AY253106	48256618	Coquillettia sp.
875	Arthropoda	AY253108	48256622	Dicyphus hesperus
876	Arthropoda	AY253109	48256624	Orthotylus sp.
877	Arthropoda	AY253110	48256626	Polymerus castilleja
878	Arthropoda	AY253113	48256632	Tropidosteptes sp.
879	Arthropoda	AY253114	48256634	Pronotacantha annulata
880	Arthropoda	AY253116	48256638	Ceratocapsus sp.
881	Arthropoda	AY253117	48256640	Pilophoropsis brachycerus
882	Arthropoda	AY253119	48256644	Prepops sp.
883	Arthropoda	AY253121	48256646	Plagiognathus laricicola
884	Arthropoda	AY253122	48256647	Onymocoris izzardi
885	Arthropoda	AY253123	48256649	Thaumastocoris petilis
886	Arthropoda	AY253124	48256650	Myiomma sp.
887	Arthropoda	AY253125	48256651	Odoniellina sp.
888	Arthropoda	AY253126	48256652	Helopeltis sp.
889	Arthropoda	AY253128	48256655	Kleidocerys sp.
890	Arthropoda	AY253129	48256657	Neacoryphus sp.
891	Arthropoda	AY253130	48256659	Neoneides muticus
892	Arthropoda	AY253131	48256661	Woodwardiola sp.
893	Arthropoda	AY253133	48256664	Coridromius sp.
894	Arthropoda	AY253134	48256666	Hypseloecus sp.
895	Arthropoda	AY253136	48256670	Dieuches sp.
896	Arthropoda	AY253138	48256673	Pachygrontha sp.
897	Arthropoda	AY253139	48256675	Serinthea sp.
898	Arthropoda	AY562127	49175658	Pseudocarcinus gigas
899	Arthropoda	AY659990	49175758	Macrobrachium rosenbergii
900	Arthropoda	AY600452	49175802	Noctua atlantica
901	Arthropoda	AY660929	49343209	Gryllotalpa orientalis
902	Arthropoda	AY651007	50058509	Moneilema appressum
903	Arthropoda	AY651009	50058513	Moneilema armatum
904	Arthropoda	AY651017	50058529	Lyopinus sp.
905	Arthropoda	AY639935	50059210	Thermobia domestica
906	Arthropoda	AY639936	50059224	Squilla mantis
907	Arthropoda	AY639937	50059238	Parhyale hawaiiensis
908	Arthropoda	AY665663	50363124	Calanus sinicus
909	Arthropoda	AY687866	50402839	Pteronarcys princeps
910	Arthropoda	AB126004	50511272	Periplaneta fuliginosa
911	Arthropoda	AY682077	50660318	Callinectes sapidus
912	Arthropoda	AY699271	50897498	Harpiosquilla harpax
913	Arthropoda	AY569088	51341107	Papilio lormieri
914	Arthropoda	AY569095	51341128	Papilio erithonioides
915	Arthropoda	AY612856	51511763	Heterocarpus amacula
916	Arthropoda	AY612857	51511765	Heterocarpus calmani
917	Arthropoda	AY612858	51511767	Heterocarpus ensifer
918	Arthropoda	AY612861	51511773	Heterocarpus gibbosus
919	Arthropoda	AY612863	51511777	Heterocarpus hayashii
920	Arthropoda	AY612865	51511781	Heterocarpus laevigatus
921	Arthropoda	AY612866	51511783	Heterocarpus parvispina
922	Arthropoda	AY612867	51511785	Heterocarpus sibogae
923	Arthropoda	AY612869	51511789	Plesionika ensis
924	Arthropoda	AY691655	51921626	Bothropolys sp.
925	Arthropoda	AB167539	52000490	Megabalanus volcano
926	Arthropoda	AY754819	54112363	Pseudeuphausia sinica
927	Arthropoda	AY771989	54306466	Japyx solifugus
928	Arthropoda	AF187796	54639873	Melitaea persea
929	Arthropoda	AF187808	54639883	Chlosyne theona
930	Arthropoda	AY793551	55416598	Nesomachilis australica
931	Arthropoda	AY804350	55832273	Battus belus
932	Arthropoda	AY804351	55832275	Battus crassus
933	Arthropoda	AY804357	55832287	Parides aeneas
934	Arthropoda	AY804360	55832293	Parides agavus
935	Arthropoda	AY804363	55832299	Parides anchises
936	Arthropoda	AY804364	55832301	Parides ascanius
937	Arthropoda	AY804370	55832313	Parides eurimedes
938	Arthropoda	AY804372	55832317	Parides lysander
939	Arthropoda	AY804373	55832319	Parides neophilus
940	Arthropoda	AY804377	55832327	Parides panthonus
941	Arthropoda	AY804379	55832331	Parides proneus
942	Arthropoda	AY804381	55832335	Parides sesostris
943	Arthropoda	AY804383	55832339	Parides vertumnus
944	Arthropoda	AY804384	55832341	Parides zacynthus
945	Arthropoda	AY708353	56555449	Moneilema gigas
946	Arthropoda	AY708375	56555493	Moneilema michelbacheri
947	Arthropoda	AY708376	56555495	Moneilema semipunctatum
948	Arthropoda	AB193078	56676219	Panulirus sp.
949	Arthropoda	AY855061	57222546	Danaus ismare
950	Arthropoda	AY827475	57338537	Kladothrips nicolsoni
951	Arthropoda	AY827477	57338541	Kladothrips rugosus
952	Arthropoda	AY875213	58258030	Homalodisca coagulata
953	Arthropoda	AJ870398	58372009	Rhodometra sacraria
954	Arthropoda	AJ870400	58372013	Idaea sericeata
955	Arthropoda	AY830425	58397541	Eurythenes gryllus
956	Arthropoda	AY788591	58614805	Adelpha bredowii
957	Arthropoda	AY788595	58614813	Byblia anvatara
958	Arthropoda	AY788597	58614817	Dynamine maeon
959	Arthropoda	AY788601	58614825	Chersonesia rahria
960	Arthropoda	AY788603	58614829	Marpesia chiron
961	Arthropoda	AY788615	58614853	Baeotus beotus
962	Arthropoda	AY788616	58614855	Baeotus deucalion
963	Arthropoda	AY788618	58614859	Eresia ofella
964	Arthropoda	AY788623	58614869	Eresia coela
965	Arthropoda	AY788625	58614873	Eresia letitia
966	Arthropoda	AY788626	58614875	Eresia pelonia
967	Arthropoda	AY788642	58614907	Junonia artaxia
968	Arthropoda	AY788647	58614917	Junonia sophia
969	Arthropoda	AY788650	58614923	Kallima inachus
970	Arthropoda	AY788652	58614927	Junonia cymodoce
971	Arthropoda	AY788664	58614951	Precis andremiaja
972	Arthropoda	AY788672	58614967	Protogoniomorpha cytora
973	Arthropoda	AY788681	58614985	Tegosa anieta
974	Arthropoda	AY788686	58614995	Vanessa braziliensis
975	Arthropoda	AY701189	58917829	Orconectes harrisoni
976	Arthropoda	AY701190	58917831	Cambarus bartonii
977	Arthropoda	AY701191	58917833	Cambarus diogenes
978	Arthropoda	AY701192	58917834	Cambarus graysoni
979	Arthropoda	AY701193	58917836	Hobbseus valleculus
980	Arthropoda	AY701197	58917842	Orconectes sloanii
981	Arthropoda	AY701198	58917844	Orconectes indianensis
982	Arthropoda	AY701199	58917845	Orconectes limosus
983	Arthropoda	AY701200	58917847	Orconectes wrighti
984	Arthropoda	AY701201	58917849	Orconectes inermis
985	Arthropoda	AY701202	58917850	Orconectes pagei
986	Arthropoda	AY701203	58917852	Orconectes pellucidus
987	Arthropoda	AY701205	58917854	Orconectes deanae
988	Arthropoda	AY701206	58917856	Orconectes difficilis
989	Arthropoda	AY701207	58917858	Orconectes hartfieldi
990	Arthropoda	AY701208	58917860	Orconectes maletae
991	Arthropoda	AY701210	58917864	Orconectes perfectus
992	Arthropoda	AY701211	58917866	Orconectes hobbsi
993	Arthropoda	AY701212	58917868	Orconectes meeki
994	Arthropoda	AY701214	58917871	Orconectes palmeri
995	Arthropoda	AY701215	58917873	Orconectes alabamensis
996	Arthropoda	AY701216	58917875	Orconectes chickasawae
997	Arthropoda	AY701217	58917876	Orconectes compressus
998	Arthropoda	AY701218	58917877	Orconectes cooperi
999	Arthropoda	AY701219	58917878	Orconectes etnieri
1000	Arthropoda	AY701220	58917880	Orconectes immunis
1001	Arthropoda	AY701221	58917881	Orconectes jonesi
1002	Arthropoda	AY701222	58917883	Orconectes mississippiensis
1003	Arthropoda	AY701223	58917885	Orconectes nais
1004	Arthropoda	AY701224	58917887	Orconectes rhoadesi
1005	Arthropoda	AY701225	58917889	Orconectes holti
1006	Arthropoda	AY701226	58917890	Orconectes illinoiensis
1007	Arthropoda	AY701227	58917892	Orconectes acares
1008	Arthropoda	AY701228	58917893	Orconectes barrenensis
1009	Arthropoda	AY701229	58917894	Orconectes carolinensis
1010	Arthropoda	AY701230	58917896	Orconectes cristavarius
1011	Arthropoda	AY701231	58917897	Orconectes forceps
1012	Arthropoda	AY701232	58917898	Orconectes hylas
1013	Arthropoda	AY701234	58917902	Orconectes longidigitus
1014	Arthropoda	AY701235	58917904	Orconectes luteus
1015	Arthropoda	AY701236	58917906	Orconectes macrus
1016	Arthropoda	AY701237	58917907	Orconectes medius
1017	Arthropoda	AY701238	58917909	Orconectes menae
1018	Arthropoda	AY701239	58917910	Orconectes mirus
1019	Arthropoda	AY701241	58917913	Orconectes neglectus
1020	Arthropoda	AY701242	58917915	Orconectes ozarkae
1021	Arthropoda	AY701243	58917917	Orconectes peruncus
1022	Arthropoda	AY701244	58917919	Orconectes punctimanus
1023	Arthropoda	AY701245	58917921	Orconectes putnami
1024	Arthropoda	AY701246	58917923	Orconectes quadruncus
1025	Arthropoda	AY701247	58917925	Orconectes ronaldi
1026	Arthropoda	AY701249	58917929	Orconectes rusticus
1027	Arthropoda	AY701250	58917931	Orconectes saxatilis
1028	Arthropoda	AY701251	58917933	Orconectes spinosus
1029	Arthropoda	AY701252	58917935	Orconectes williamsi
1030	Arthropoda	AY800161	60476469	Aulacus sp.
1031	Arthropoda	AY926657	60501892	Chaetogammarus stoerensis
1032	Arthropoda	AY926674	60501926	Gammarus oceanicus
1033	Arthropoda	AY926689	60501956	Plesiogammarus brevis
1034	Arthropoda	AY788414	60543857	Ceratitis caetrata
1035	Arthropoda	AY788422	60543873	Ceratitis cristata
1036	Arthropoda	AY788423	60543875	Ceratitis curvata
1037	Arthropoda	AY788434	60543897	Ceratitis podocarpi
1038	Arthropoda	AY788450	60543929	Trirhithrum nigerrimum
1039	Arthropoda	AY818068	60549373	Macrotermes sp.
1040	Arthropoda	AY818073	60549383	Odontotermes badius
1041	Arthropoda	AY818076	60549389	Odontotermes transvaalensis
1042	Arthropoda	AY818077	60549391	Synacanthotermes zanzibarensis
1043	Arthropoda	AY818082	60549401	Hypotermes sp.
1044	Arthropoda	AY818085	60549407	Allodontermes tenax
1045	Arthropoda	AY818088	60549413	Macrotermes natalensis
1046	Arthropoda	AY920997	60595512	Kladothrips cf.
1047	Arthropoda	AY757280	60687011	Drosophila pseudoananassae
1048	Arthropoda	AY757281	60687013	Drosophila orena
1049	Arthropoda	AY757282	60687015	Drosophila parabipectinata
1050	Arthropoda	AY757284	60687019	Drosophila jambulina
1051	Arthropoda	AY947836	61105789	Pseudosquilla ciliata
1052	Arthropoda	AY956355	61200956	Petrobius brevistylis
1053	Arthropoda	AY750089	61677358	Drosophila tsigana
1054	Arthropoda	AY750090	61677360	Drosophila lacertosa
1055	Arthropoda	AY750091	61677362	Drosophila longiserrata
1056	Arthropoda	AY750094	61677368	Drosophila melanica
1057	Arthropoda	AY750096	61677372	Drosophila micromelanica
1058	Arthropoda	AY750097	61677374	Drosophila moriwakii
1059	Arthropoda	AY750099	61677378	Drosophila paramelanica
1060	Arthropoda	AY750105	61677390	Drosophila neokadai
1061	Arthropoda	AY750106	61677392	Drosophila medioconstricta
1062	Arthropoda	AY750108	61677396	Drosophila gani
1063	Arthropoda	AY750110	61677400	Drosophila okadai
1064	Arthropoda	AY750111	61677402	Drosophila pseudosordidula
1065	Arthropoda	AY750112	61677404	Drosophila robusta
1066	Arthropoda	AY750113	61677406	Drosophila sordidula
1067	Arthropoda	AY750114	61677408	Drosophila unimaculata
1068	Arthropoda	AY968672	61724624	Campanulotes bidentatus
1069	Arthropoda	AJ749423	62146734	Hippotion celerio
1070	Arthropoda	AJ749425	62146740	Hippotion echeclus
1071	Arthropoda	AJ749435	62146770	Hyles lineata
1072	Arthropoda	AJ749443	62146794	Hyles livornicoides
1073	Arthropoda	AJ749444	62146797	Hyles nicaea
1074	Arthropoda	AJ749449	62146810	Hyles livornica
1075	Arthropoda	AJ749545	62147091	Hyles tithymali
1076	Arthropoda	AJ749579	62147193	Hyles gallii
1077	Arthropoda	AB192473	62318321	Papilio okinawensis
1078	Arthropoda	AB192476	62318327	Neozephyrus japonicus
1079	Arthropoda	AB192485	62318345	Pelopidas agna
1080	Arthropoda	AB192491	62318357	Thymelicus sylvaticus
1081	Arthropoda	AB192500	62318375	Leptalina unicolor
1082	Arthropoda	AY721593	62720596	Orconectes validus
1083	Arthropoda	AY997313	62721199	Bruchus rufimanus
1084	Arthropoda	AY997314	62721201	Stator aegrotus
1085	Arthropoda	AY997315	62721203	Stator beali
1086	Arthropoda	AY997316	62721205	Stator bottimeri
1087	Arthropoda	AY997317	62721207	Stator chalcodermus
1088	Arthropoda	AY997318	62721209	Stator chihuahua
1089	Arthropoda	AY997320	62721213	Stator furcatus
1090	Arthropoda	AY997321	62721215	Stator generalis
1091	Arthropoda	AY997339	62721251	Stator limbatus
1092	Arthropoda	AY997342	62721257	Stator maculatopygus
1093	Arthropoda	AY997345	62721263	Stator monachus
1094	Arthropoda	AY997346	62721265	Stator pacarae
1095	Arthropoda	AY997350	62721273	Stator pygidialis
1096	Arthropoda	AY997352	62721277	Stator sordidus
1097	Arthropoda	AY997353	62721279	Stator subaeneus
1098	Arthropoda	AY997355	62721283	Stator tigrensis
1099	Arthropoda	AY997357	62721287	Stator trisignatus
1100	Arthropoda	AY997358	62721289	Stator vachelliae
1101	Arthropoda	AY997363	62721299	Stator vittatithorax
1102	Arthropoda	AY997364	62721301	Sennius breveapicalis
1103	Arthropoda	AY997365	62721303	Sennius morosus
1104	Arthropoda	AY918910	62768455	Mischocyttarus sp.
1105	Arthropoda	AY918911	62768457	Chartergus metanotalis
1106	Arthropoda	AY918912	62768459	Metapolybia sp.
1107	Arthropoda	AY918913	62768461	Polybia sericea
1108	Arthropoda	AY918914	62768463	Protopolybia sp.
1109	Arthropoda	AY918915	62768465	Agelaia sp.
1110	Arthropoda	AY918916	62768467	Apoica albimacula
1111	Arthropoda	AY918917	62768469	Apoica ambracarina
1112	Arthropoda	AY918919	62768473	Apoica gelida
1113	Arthropoda	AY918922	62768479	Apoica flavissima
1114	Arthropoda	AY731173	62861432	Endeis spinosa
1115	Arthropoda	AP006346	63003723	Marsupenaeus japonicus
1116	Arthropoda	AY919288	63020478	Pharmacophagus antenor
1117	Arthropoda	AY919291	63020487	Ornithoptera euphorion
1118	Arthropoda	AY954562	63030156	Lycaena helloides
1119	Arthropoda	AY954563	63030158	Uraneis hyalina
1120	Arthropoda	AY954567	63030166	Pseudopieris nehemia
1121	Arthropoda	AY954568	63030168	Eurema mexicana
1122	Arthropoda	AY954571	63030174	Colotis hetaera
1123	Arthropoda	AY954572	63030176	Ixias pyrene
1124	Arthropoda	AY954574	63030180	Anthocharis belia
1125	Arthropoda	AY954577	63030186	Saletara liberia
1126	Arthropoda	AY954579	63030190	Appias drusilla
1127	Arthropoda	AY954580	63030192	Phulia nymphula
1128	Arthropoda	AY954587	63030206	Belenois java
1129	Arthropoda	AY954589	63030210	Dixeia charina
1130	Arthropoda	DQ018953	66096838	Hamearis lucina
1131	Arthropoda	DQ018954	66096840	Danaus plexippus
1132	Arthropoda	DQ018957	66096846	Opsiphanes quiteria
1133	Arthropoda	DQ073916	66864616	Adoxophyes honmai
1134	Arthropoda	DQ012618	68265979	Alloxysta sp.
1135	Arthropoda	DQ012619	68265981	Andricus caputmedusae
1136	Arthropoda	DQ012620	68265983	Andricus coriarius
1137	Arthropoda	DQ012621	68265985	Andricus curvator
1138	Arthropoda	DQ012623	68265989	Andricus inflator
1139	Arthropoda	DQ012624	68265991	Andricus mayri
1140	Arthropoda	DQ012625	68265993	Andricus pictus
1141	Arthropoda	DQ012627	68265997	Aulacidea freesei
1142	Arthropoda	DQ012629	68266001	Aulacidea phlomica
1143	Arthropoda	DQ012630	68266003	Aylax hypecoi
1144	Arthropoda	DQ012631	68266005	Aylax minor
1145	Arthropoda	DQ012632	68266007	Iraella hispanica
1146	Arthropoda	DQ012633	68266009	Callirhytis clavula
1147	Arthropoda	DQ012634	68266011	Callirhytis tumifica
1148	Arthropoda	DQ012635	68266013	Ceroptres clavicornis
1149	Arthropoda	DQ012637	68266017	Dryocosmus quercuspalustris
1150	Arthropoda	DQ012638	68266019	Cynips quercus
1151	Arthropoda	DQ012640	68266023	Diastrophus rubi
1152	Arthropoda	DQ012643	68266029	Isocolus leuzeae
1153	Arthropoda	DQ012644	68266031	Isocolus lichtensteini
1154	Arthropoda	DQ012650	68266043	Rhoophilus loewi
1155	Arthropoda	DQ012651	68266045	Saphonecrus lusitanicus
1156	Arthropoda	DQ012653	68266049	Synergus sp.
1157	Arthropoda	DQ012654	68266051	Synergus thaumacerus
1158	Arthropoda	DQ012655	68266053	Synergus umbraculus
1159	Arthropoda	DQ012656	68266055	Synophrus politus
1160	Arthropoda	DQ012657	68266057	Timaspis urospermi
1161	Arthropoda	DQ012658	68266059	Trigonaspis mendesi
1162	Arthropoda	DQ094965	70610801	Cyamus ovalis
1163	Arthropoda	DQ095102	70611135	Cyamus gracilis
1164	Arthropoda	DQ095139	70611224	Cyamus erraticus
1165	Arthropoda	DQ095150	70611246	Cyamus boopis
1166	Arthropoda	DQ021446	70779445	Daktulosphaira vitifoliae
1167	Arthropoda	AJ832108	71273751	Saltella sphondylii
1168	Arthropoda	AJ832112	71273760	Themira biloba
1169	Arthropoda	DQ070265	71392220	Exosphaeroma hylecoetes
1170	Arthropoda	DQ074370	71980240	Myrmica rubra
1171	Arthropoda	DQ074361	72256175	Aphaenogaster iberica
1172	Arthropoda	DQ074362	72256177	Messor chamberlini
1173	Arthropoda	DQ074363	72256179	Messor lobognathus
1174	Arthropoda	AB187570	73486735	Geothelphusa dehaani
1175	Arthropoda	DQ071864	73533005	Velamysta pupilla
1176	Arthropoda	DQ069230	73811251	Athyrtis mechanitis
1177	Arthropoda	DQ069237	73811272	Hyalyris antea
1178	Arthropoda	DQ069239	73811278	Methona sp.
1179	Arthropoda	DQ069242	73811287	Pteronymia veia
1180	Arthropoda	DQ157480	74483733	Ceratinia neso
1181	Arthropoda	DQ157482	74483739	Ceratinia tutia
1182	Arthropoda	DQ157484	74483745	Dircenna dero
1183	Arthropoda	DQ157486	74483751	Dircenna paradoxa
1184	Arthropoda	DQ157487	74483754	Episcada apuleia
1185	Arthropoda	DQ157489	74483760	Episcada carcinia
1186	Arthropoda	DQ157490	74483763	Episcada clausina
1187	Arthropoda	DQ157491	74483766	Episcada hymenaea
1188	Arthropoda	DQ157492	74483769	Epityches eupompe
1189	Arthropoda	DQ157495	74483778	Godyris duillia
1190	Arthropoda	DQ157496	74483781	Greta andromica
1191	Arthropoda	DQ157497	74483784	Greta annette
1192	Arthropoda	DQ157498	74483787	Greta polissena
1193	Arthropoda	DQ157500	74483793	Heterosais giulia
1194	Arthropoda	DQ157501	74483796	Hyalenna sp.
1195	Arthropoda	DQ157504	74483805	Hypoleria lavinia
1196	Arthropoda	DQ157506	74483811	Hypothyris cantobrica
1197	Arthropoda	DQ157507	74483814	Hypothyris daphnis
1198	Arthropoda	DQ157516	74483840	Megoleria susiana
1199	Arthropoda	DQ157517	74483843	Melinaea isocomma
1200	Arthropoda	DQ157522	74483857	Napeogenes pharo
1201	Arthropoda	DQ157524	74483863	Oleria aquata
1202	Arthropoda	DQ157526	74483869	Oleria aegineta
1203	Arthropoda	DQ157534	74483893	Pseudoscada erruca
1204	Arthropoda	DQ157536	74483899	Pseudoscada timna
1205	Arthropoda	DQ157537	74483902	Pteronymia aletta
1206	Arthropoda	DQ157539	74483908	Pteronymia oneida
1207	Arthropoda	DQ157541	74483914	Pteronymia ticida
1208	Arthropoda	DQ157542	74483917	Pteronymia tucuna
1209	Arthropoda	DQ157543	74483920	Sais rosalia
1210	Arthropoda	DQ157550	74483941	Lycorea halia
1211	Arthropoda	DQ191682	75214337	Gonodactylus chiragra
1212	Arthropoda	DQ191684	75214534	Squilla empusa
1213	Arthropoda	DQ076209	75756176	Anopheles albitarsis
1214	Arthropoda	DQ076229	75756214	Anopheles deaneorum
1215	Arthropoda	DQ176362	77377532	Pararge xiphioides
1216	Arthropoda	DQ176417	77377642	Pararge aegeria
1217	Arthropoda	AB093144	77539299	Neocalanus gracilis
1218	Arthropoda	AB093146	77539306	Neocalanus tonsus
1219	Arthropoda	DQ058696	77546867	Ceutorhynchus subpubescens
1220	Arthropoda	DQ058698	77546873	Ceutorhynchus erysimi
1221	Arthropoda	DQ058700	77546879	Ceutorhynchus gallorhenanus
1222	Arthropoda	DQ200297	77921187	Geomydoecus wernecki
1223	Arthropoda	DQ200302	77921197	Geomydoecus traubi
1224	Arthropoda	DQ200304	77921201	Geomydoecus mexicanus
1225	Arthropoda	DQ200313	77921219	Geomydoecus perotensis
1226	Arthropoda	DQ200322	77921237	Geomydoecus veracruzensis
1227	Arthropoda	DQ200323	77921239	Geomydoecus fulvescens
1228	Arthropoda	DQ200330	77921253	Geomydoecus coronadoi
1229	Arthropoda	DQ201428	78128032	Australobius scabrior
1230	Arthropoda	DQ201429	78128034	Lamyctes emarginatus
1231	Arthropoda	DQ201431	78128038	Scolopendra viridis
1232	Arthropoda	DQ222166	81158347	Scutigerina weberi
1233	Arthropoda	DQ222167	81158349	Scutigerina malagassa
1234	Arthropoda	DQ222168	81158351	Pselliodes guildingii
1235	Arthropoda	DQ222171	81158357	Thereuopoda clunifera
1236	Arthropoda	DQ222172	81158359	Thereuopoda longicornis
1237	Arthropoda	DQ222173	81158361	Thereuonema tuberculata
1238	Arthropoda	DQ222174	81158363	Allothereua maculata
1239	Arthropoda	DQ222176	81158367	Allothereua serrulata
1240	Arthropoda	DQ222178	81158371	Parascutigera latericia
1241	Arthropoda	DQ241798	82541825	Sclerophasma paresisensis
1242	Arthropoda	DQ241799	82541839	Timema californicum
1243	Arthropoda	DQ225125	82659131	Tigriopus japonicus
1244	Arthropoda	DQ225128	82659137	Tigriopus sp.
1245	Arthropoda	DQ225129	82659139	Tigriopus brevicornis
1246	Arthropoda	DQ247739	82791339	Dioryctria abietella
1247	Arthropoda	DQ241796	82792109	Grylloblatta sculleni
1248	Arthropoda	DQ295258	82880025	Melolontha melolontha
1249	Arthropoda	DQ295268	82880045	Amphimallon solstitiale
1250	Arthropoda	DQ295283	82880075	Phyllopertha horticola
1251	Arthropoda	DQ295298	82880105	Maladera holosericea
1252	Arthropoda	DQ295300	82880109	Protaetia cuprea
1253	Arthropoda	DQ295303	82880115	Poecilus versicolor
1254	Arthropoda	DQ295309	82880127	Poecilus cupreus
1255	Arthropoda	DQ295312	82880133	Calliphora sp.
1256	Arthropoda	DQ344025	84371421	Antrokoreana gracilipes
1257	Arthropoda	DQ324548	84663145	Polyplax borealis
1258	Arthropoda	DQ324549	84663147	Polyplax auricularis
1259	Arthropoda	DQ324551	84663151	Fahrenholzia ferrisi
1260	Arthropoda	DQ324552	84663153	Fahrenholzia hertigi
1261	Arthropoda	DQ324557	84663163	Fahrenholzia microcephala
1262	Arthropoda	DQ324561	84663171	Fahrenholzia reducta
1263	Arthropoda	DQ324582	84663213	Fahrenholzia boleni
1264	Arthropoda	DQ324583	84663215	Fahrenholzia pinnata
1265	Arthropoda	DQ324587	84663223	Fahrenholzia tribulosa
1266	Arthropoda	DQ324588	84663225	Fahrenholzia fairchildi
1267	Arthropoda	DQ324592	84663233	Fahrenholzia texana
1268	Arthropoda	DQ324621	84682996	Fahrenholzia ehrlichi
1269	Arthropoda	DQ324631	84683016	Fahrenholzia zacatecae
1270	Arthropoda	DQ295178	84873992	Dioryctria okanaganella
1271	Arthropoda	DQ338582	85013484	Godartiana muscosa
1272	Arthropoda	DQ338589	85013498	Chillanella stelligera
1273	Arthropoda	DQ338595	85013510	Hipparchia fidia
1274	Arthropoda	DQ338750	85013840	Thaumantis klugius
1275	Arthropoda	DQ338751	85013842	Thauria aliris
1276	Arthropoda	DQ338752	85013844	Zeuxidia dorhni
1277	Arthropoda	DQ338754	85013848	Catoblepia orgetorix
1278	Arthropoda	DQ338760	85013860	Elymnias casiphone
1279	Arthropoda	DQ338768	85013876	Lethe minerva
1280	Arthropoda	DQ338772	85013884	Satyrodes eurydice
1281	Arthropoda	DQ338773	85013886	Ethope noirei
1282	Arthropoda	DQ338784	85013908	Idioneurula sp.
1283	Arthropoda	DQ338786	85013912	Manerebia indirena
1284	Arthropoda	DQ338787	85013914	Tamania jacquelinae
1285	Arthropoda	DQ338803	85013946	Paramacera allyni
1286	Arthropoda	DQ338820	85013980	Argyronympha ulava
1287	Arthropoda	DQ338821	85013982	Argyrophenga antipodium
1288	Arthropoda	DQ338822	85013984	Dodonidia helmsi
1289	Arthropoda	DQ338823	85013986	Erebiola butleri
1290	Arthropoda	DQ338827	85013994	Lamprolenis nitida
1291	Arthropoda	DQ338832	85014004	Auca barrosi
1292	Arthropoda	DQ338833	85014006	Auca coctei
1293	Arthropoda	DQ338834	85014008	Cosmosatyrus leptoneuroides
1294	Arthropoda	DQ338835	85014010	Elina montroli
1295	Arthropoda	DQ338836	85014012	Etcheverrius chiliensis
1296	Arthropoda	DQ338838	85014016	Quilaphoetosus monachus
1297	Arthropoda	DQ338841	85014022	Pyronia bathseba
1298	Arthropoda	DQ338849	85014038	Eteona tisiphone
1299	Arthropoda	DQ338852	85014044	Lasiophila piscina
1300	Arthropoda	DQ338870	85014080	Neominois ridingsii
1301	Arthropoda	DQ338875	85014090	Ypthima baldus
1302	Arthropoda	DQ338876	85014092	Ypthima confusa
1303	Arthropoda	DQ338877	85014094	Ypthima fasciata
1304	Arthropoda	DQ338878	85014096	Ypthimomorpha itonia
1305	Arthropoda	DQ338576	85014108	Palla decius
1306	Arthropoda	DQ338577	85014110	Antirrhea philoctetes
1307	Arthropoda	DQ351027	85740649	Parnassius tenedius
1308	Arthropoda	DQ351028	85740650	Parnassius delphius
1309	Arthropoda	DQ351030	85740652	Parnassius simonius
1310	Arthropoda	DQ351031	85740653	Archon apollinus
1311	Arthropoda	DQ351032	85740654	Archon apollinaris
1312	Arthropoda	DQ351038	85740660	Bhutanitis lidderdalii
1313	Arthropoda	DQ351039	85740661	Zerynthia polyxena
1314	Arthropoda	DQ351040	85740662	Allancastria louristana
1315	Arthropoda	DQ351042	85740664	Allancastria caucasica
1316	Arthropoda	DQ351043	85740665	Allancastria deyrollei
1317	Arthropoda	DQ351372	86211787	Iphinoe truncata
1318	Arthropoda	DQ353276	87046738	Paraponera clavata
1319	Arthropoda	DQ353277	87046740	Concoctio concenta
1320	Arthropoda	DQ353278	87046742	Eciton hamatum
1321	Arthropoda	DQ353279	87046744	Forelius sp.
1322	Arthropoda	DQ353282	87046750	Camponotus ocreatus
1323	Arthropoda	DQ353285	87046756	Chyphotes sp.
1324	Arthropoda	DQ353289	87046764	Terataner sp.
1325	Arthropoda	DQ353291	87046768	Amblyopone pallipes
1326	Arthropoda	DQ353292	87046770	Prionopelta sp.
1327	Arthropoda	DQ353294	87046774	Brachymyrmex sp.
1328	Arthropoda	DQ353295	87046776	Acropyga epedana
1329	Arthropoda	DQ353296	87046778	Wasmannia sp.
1330	Arthropoda	DQ353298	87046782	Mystrium rogeri
1331	Arthropoda	DQ353300	87046786	Goniomma hispanicum
1332	Arthropoda	DQ353302	87046790	Leptanilloides nubecula
1333	Arthropoda	DQ353305	87046796	Monomorium destructor
1334	Arthropoda	DQ353311	87046808	Proformica nasuta
1335	Arthropoda	DQ353312	87046810	Mayriella transfuga
1336	Arthropoda	DQ353313	87046812	Philidris cordatus
1337	Arthropoda	DQ353315	87046816	Proatta butteli
1338	Arthropoda	DQ353316	87046818	Cardiocondyla obscurior
1339	Arthropoda	DQ353318	87046822	Myrmoteras williamsi
1340	Arthropoda	DQ353319	87046824	Stenamma snellingi
1341	Arthropoda	DQ353324	87046834	Linepithema keiteli
1342	Arthropoda	DQ353325	87046836	Polyergus breviceps
1343	Arthropoda	DQ353326	87046838	Pristomyrmex sp.
1344	Arthropoda	DQ353327	87046840	Aenictus sp.
1345	Arthropoda	DQ353328	87046842	Ocymyrmex picardi
1346	Arthropoda	DQ353330	87046846	Myrmecocystus mexicanus
1347	Arthropoda	DQ353332	87046850	Hypoponera inexorata
1348	Arthropoda	DQ353334	87046854	Podomyrma sp.
1349	Arthropoda	DQ353336	87046858	Pachycondyla stigma
1350	Arthropoda	DQ353339	87046864	Atopomyrmex mocquerysi
1351	Arthropoda	DQ353340	87046866	Tapinoma opacum
1352	Arthropoda	DQ353341	87046868	Froggattella latispina
1353	Arthropoda	DQ353342	87046870	Aphaenogaster texana
1354	Arthropoda	DQ353343	87046872	Cataglyphis ibericus
1355	Arthropoda	DQ353345	87046876	Sericomyrmex sp.
1356	Arthropoda	DQ353346	87046878	Acanthomyops latipes
1357	Arthropoda	DQ353347	87046880	Azteca sp.
1358	Arthropoda	DQ353349	87046884	Messor julianus
1359	Arthropoda	DQ353352	87046890	Plagiolepis sp.
1360	Arthropoda	DQ353353	87046892	Prolasius sp.
1361	Arthropoda	DQ353354	87046894	Aneuretus simoni
1362	Arthropoda	DQ353357	87046900	Platythyrea punctata
1363	Arthropoda	DQ353359	87046904	Cephalotes unimaculatus
1364	Arthropoda	DQ353361	87046908	Oligomyrmex sp.
1365	Arthropoda	DQ353362	87046910	Formica wheeleri
1366	Arthropoda	DQ353365	87046916	Heteroponera microps
1367	Arthropoda	DQ353366	87046918	Myrmecorhynchus sp.
1368	Arthropoda	DQ353367	87046920	Anochetus mayri
1369	Arthropoda	DQ353369	87046924	Dorymyrmex elegans
1370	Arthropoda	DQ353370	87046926	Nomamyrmex esenbeckii
1371	Arthropoda	DQ353373	87046932	Ectatomma brunneum
1372	Arthropoda	DQ353374	87046934	Rhytidoponera metallica
1373	Arthropoda	DQ353375	87046936	Iridomyrmex spadius
1374	Arthropoda	DQ353376	87046938	Calyptomyrmex beccarii
1375	Arthropoda	DQ353380	87046946	Cyphomyrmex sp.
1376	Arthropoda	DQ353383	87046952	Odontomachus clarus
1377	Arthropoda	DQ353384	87046954	Dorylus mayri
1378	Arthropoda	DQ353385	87046956	Melophorus sp.
1379	Arthropoda	DQ353386	87046958	Notoncus sp.
1380	Arthropoda	DQ353387	87046960	Gnamptogenys sp.
1381	Arthropoda	DQ353389	87046964	Myrmicaria brunnea
1382	Arthropoda	DQ353391	87046968	Tetramorium hispidum
1383	Arthropoda	DQ353393	87046972	Dorylus wilverthi
1384	Arthropoda	DQ353394	87046974	Liometopum luctuosum
1385	Arthropoda	DQ287358	89112067	Anopheles funestus
1386	Arthropoda	DQ453489	91208555	Lucilia thatuna
1387	Arthropoda	DQ453490	91208557	Lucilia cluvia
1388	Arthropoda	DQ453491	91208559	Lucilia eximia
1389	Arthropoda	DQ453492	91208561	Lucilia mexicana
1390	Arthropoda	DQ453494	91208565	Lucilia coeruleiviridis
1391	Arthropoda	DQ073038	91317671	Paititia neglecta
1392	Arthropoda	DQ456493	91701747	Jalmenus aridus
1393	Arthropoda	DQ456498	91701762	Jalmenus daemeli
1394	Arthropoda	DQ456500	91701768	Jalmenus eubulus
1395	Arthropoda	DQ456507	91701789	Jalmenus icilius
1396	Arthropoda	DQ456510	91701798	Jalmenus ictinus
1397	Arthropoda	DQ456513	91701807	Jalmenus inous
1398	Arthropoda	DQ456515	91701813	Jalmenus lithochroa
1399	Arthropoda	DQ456517	91701819	Jalmenus pseudictinus
1400	Arthropoda	DQ456519	91701825	Jalmenus nr.
1401	Arthropoda	DQ456522	91701834	Zesius chrysomallus
1402	Arthropoda	DQ456529	91701923	Theclinesthes albocincta
1403	Arthropoda	DQ456530	91701926	Theclinesthes onycha
1404	Arthropoda	DQ456544	91701968	Theclinesthes miskini
1405	Arthropoda	DQ456549	91701983	Theclinesthes hesperia
1406	Arthropoda	DQ456561	91702019	Sahulana scintillata
1407	Arthropoda	DQ456571	91702049	Erysichton palmyra
1408	Arthropoda	DQ390045	91718905	Austropallene cristata
1409	Arthropoda	DQ390046	91718907	Achelia hoekii
1410	Arthropoda	DQ390048	91718911	Austrodecus glaciale
1411	Arthropoda	DQ390051	91718917	Endeis mollis
1412	Arthropoda	DQ390052	91718919	Ammothea clausi
1413	Arthropoda	DQ390056	91718927	Ammothella appendiculata
1414	Arthropoda	DQ390057	91718929	Callipallene brevirostris
1415	Arthropoda	DQ390058	91718931	Pycnogonum stearnsi
1416	Arthropoda	DQ390059	91718933	Oropallene minor
1417	Arthropoda	DQ390060	91718935	Ascorhynchus castellioides
1418	Arthropoda	DQ390061	91718937	Colossendeis tenera
1419	Arthropoda	DQ390063	91718941	Decolopoda australis
1420	Arthropoda	DQ390069	91718953	Nymphopsis duodorsospinosa
1421	Arthropoda	DQ390070	91718955	Achelia sawayai
1422	Arthropoda	DQ390071	91718957	Anoplodactylus sp.
1423	Arthropoda	DQ390074	91718963	Ammothella spinifera
1424	Arthropoda	DQ390075	91718965	Eurycyde raphiaster
1425	Arthropoda	DQ390077	91718969	Austropallene cornigera
1426	Arthropoda	DQ390078	91718971	Colossendeis stramenti
1427	Arthropoda	DQ390080	91718975	Sericosura venticola
1428	Arthropoda	DQ390081	91718977	Ammothea ovatoides
1429	Arthropoda	DQ390082	91718979	Callipallene novaezealandiae
1430	Arthropoda	DQ390083	91718981	Parapallene avida
1431	Arthropoda	DQ390086	91718987	Pallenopsis macneilli
1432	Arthropoda	DQ390087	91718989	Achelia assimilis
1433	Arthropoda	DQ390088	91718991	Anoplodactylus viridintestinalis
1434	Arthropoda	DQ390089	91718993	Anoplodactylus erectus
1435	Arthropoda	DQ390090	91718995	Tanystylum californicum
1436	Arthropoda	DQ390091	91718997	Ammothea hilgendorfi
1437	Arthropoda	DQ390092	91718999	Eurycyde spinosa
1438	Arthropoda	DQ390094	91719003	Ammothella tuberculata
1439	Arthropoda	DQ390095	91719005	Pycnogonum diceros
1440	Arthropoda	DQ529236	94981334	Campodea fragilis
1441	Arthropoda	DQ529237	94981348	Campodea lubbocki
1442	Arthropoda	AY457588	95100502	Papilio demodocus
1443	Arthropoda	AB241420	95113545	Erimacrus isenbeckii
1444	Arthropoda	AJ864351	98985978	Negotinthia myrmosaeformis
1445	Arthropoda	AB244632	100811867	Hyas coarctatus
1446	Arthropoda	DQ666063	108514989	Nymphon gracile
1447	Arthropoda	DQ666065	108515053	Scutigerella causeyae
1448	Arthropoda	DQ534950	108598272	Simulium rufibasis
1449	Arthropoda	DQ649479	109810014	Banza brunnea
1450	Arthropoda	DQ649481	109810018	Banza deplanata
1451	Arthropoda	DQ649484	109810024	Banza kauaiensis
1452	Arthropoda	DQ649486	109810028	Banza mauiensis
1453	Arthropoda	DQ649487	109810030	Banza molokaiensis
1454	Arthropoda	DQ649489	109810034	Neoconocephalus sp.
1455	Arthropoda	DQ649490	109810036	Orchelimum nigripes
1456	Arthropoda	DQ649491	109810038	Banza nihoa
1457	Arthropoda	DQ649494	109810044	Banza nitida
1458	Arthropoda	DQ649496	109810048	Orocharis saltator
1459	Arthropoda	DQ649497	109810050	Banza parvula
1460	Arthropoda	DQ649500	109810056	Banza sp.
1461	Arthropoda	DQ649502	109810060	Banza unica
1462	Arthropoda	DQ471531	110189388	Drosophila nannoptera
1463	Arthropoda	DQ471532	110189390	Drosophila potamophila
1464	Arthropoda	DQ471533	110189392	Drosophila repleta
1465	Arthropoda	DQ471537	110189400	Drosophila yunnanensis
1466	Arthropoda	DQ471545	110189416	Drosophila asper
1467	Arthropoda	DQ471549	110189424	Drosophila daruma
1468	Arthropoda	DQ471550	110189426	Drosophila multidentata
1469	Arthropoda	DQ471551	110189428	Drosophila perlucida
1470	Arthropoda	DQ471555	110189436	Drosophila polychaeta
1471	Arthropoda	DQ471559	110189444	Drosophila fluvialis
1472	Arthropoda	DQ471560	110189446	Drosophila hirtipes
1473	Arthropoda	DQ471561	110189448	Drosophila latifshahi
1474	Arthropoda	DQ471562	110189450	Drosophila pilosa
1475	Arthropoda	DQ471563	110189452	Drosophila quadrisetata
1476	Arthropoda	DQ471565	110189456	Drosophila velox
1477	Arthropoda	DQ471570	110189465	Drosophila angor
1478	Arthropoda	DQ471582	110189489	Drosophila beppui
1479	Arthropoda	DQ471583	110189491	Drosophila bipatita
1480	Arthropoda	DQ471584	110189493	Drosophila bai
1481	Arthropoda	DQ471586	110189497	Drosophila barutani
1482	Arthropoda	DQ471587	110189499	Drosophila karakasa
1483	Arthropoda	DQ471591	110189507	Drosophila kanekoi
1484	Arthropoda	DQ471594	110189513	Drosophila borusta
1485	Arthropoda	DQ471596	110189516	Drosophila cf.
1486	Arthropoda	DQ471597	110189518	Drosophila americana
1487	Arthropoda	DQ471598	110189520	Drosophila anceps
1488	Arthropoda	DQ471599	110189522	Drosophila aracataca
1489	Arthropoda	DQ471600	110189524	Drosophila ezoana
1490	Arthropoda	DQ471601	110189526	Drosophila eohydei
1491	Arthropoda	DQ471606	110189536	Drosophila lummei
1492	Arthropoda	DQ471608	110189540	Drosophila montana
1493	Arthropoda	DQ656600	110287619	Fenneropenaeus chinensis
1494	Arthropoda	AM050270	110566873	Olepa schleini
1495	Arthropoda	DQ866050	111052820	Simosyrphus grandicornis
1496	Arthropoda	DQ866052	111052848	Cydistomyia duplonotata
1497	Arthropoda	DQ792578	111183087	Anopheles gambiae
1498	Arthropoda	DQ792581	111183096	Anopheles quadriannulatus
1499	Arthropoda	DQ842500	111227987	Catopsilia pomona
1500	Arthropoda	AB231668	111548625	Ixodes turdus
1501	Arthropoda	AB231671	111548631	Ixodes nipponensis
1502	Arthropoda	DQ888607	112253818	Rhagophthalmus lufengensis
1503	Arthropoda	DQ851677	114187155	Drosophila subquinaria
1504	Arthropoda	DQ851799	114187399	Drosophila recens
1505	Arthropoda	DQ631969	115490194	Lasia carbonanicus
1506	Arthropoda	DQ631973	115490201	Helle longirostris
1507	Arthropoda	DQ631974	115490203	Megalybus nr.
1508	Arthropoda	DQ631992	115490238	Antissa sp.
1509	Arthropoda	DQ631993	115490240	Tabanus rufofrater
1510	Arthropoda	DQ631996	115490246	Acrocera sp.
1511	Arthropoda	DQ631997	115490248	Thyllis crassa
1512	Arthropoda	DQ922846	115493868	Brenthis hecate
1513	Arthropoda	DQ922848	115493872	Brenthis daphne
1514	Arthropoda	DQ922852	115493880	Argynnis adippe
1515	Arthropoda	DQ922853	115493882	Argynnis kamala
1516	Arthropoda	DQ922854	115493884	Issoria lathonia
1517	Arthropoda	DQ922855	115493886	Issoria smaragdifera
1518	Arthropoda	DQ922857	115493890	Issoria eugenia
1519	Arthropoda	DQ922859	115493894	Yramea inca
1520	Arthropoda	DQ922862	115493900	Argynnis pandora
1521	Arthropoda	DQ922866	115493908	Boloria pales
1522	Arthropoda	DQ922867	115493910	Boloria aquilonaris
1523	Arthropoda	DQ922869	115493914	Boloria eunomia
1524	Arthropoda	DQ872698	115605829	Scrapter algoensis
1525	Arthropoda	DQ872714	115605861	Chilimelissa rozeni
1526	Arthropoda	EF032210	117276702	Xyela sp.
1527	Arthropoda	EF032213	117276708	Tenthredo mesomela
1528	Arthropoda	EF032214	117276710	Dolerus sp.
1529	Arthropoda	EF032215	117276712	Athalia sp.
1530	Arthropoda	EF032216	117276714	Nematus sp.
1531	Arthropoda	EF032217	117276716	Gilpinia sp.
1532	Arthropoda	EF032218	117276718	Cimbex americana
1533	Arthropoda	EF032221	117276724	Arge cyanocrocea
1534	Arthropoda	EF032222	117276726	Sterictiphora furcata
1535	Arthropoda	EF032223	117276728	Onycholyda amplecta
1536	Arthropoda	EF032224	117276730	Neurotoma fasciata
1537	Arthropoda	EF032226	117276734	Acantholyda posticalis
1538	Arthropoda	EF032227	117276736	Megalodontes cephalotes
1539	Arthropoda	EF032228	117276738	Cephus pygmaeus
1540	Arthropoda	EF032238	117276758	Perga condei
1541	Arthropoda	EF032239	117276760	Phylacteophaga froggatti
1542	Arthropoda	EF032275	117276805	Aglaostigma lichtwardti
1543	Arthropoda	EF032276	117276807	Selandria serva
1544	Arthropoda	EF032280	117276815	Abia cf.
1545	Arthropoda	EF032285	117276825	Arge nigripes
1546	Arthropoda	EF032290	117276835	Enicospilus sp.
1547	Arthropoda	AY687948	117582121	Fergusonina turneri
1548	Arthropoda	EF104650	118582602	Agromyza frontella
1549	Arthropoda	EF104652	118582606	Agromyza sp.
1550	Arthropoda	EF104654	118582610	Hexomyza schineri
1551	Arthropoda	EF104655	118582612	Japanagromyza viridula
1552	Arthropoda	EF104658	118582618	Melanagromyza minimoides
1553	Arthropoda	EF104660	118582622	Melanagromyza virens
1554	Arthropoda	EF104662	118582626	Ophiomyia cornuta
1555	Arthropoda	EF104664	118582630	Ophiomyia phaseoli
1556	Arthropoda	EF104665	118582632	Ophiomyia quinta
1557	Arthropoda	EF104667	118582636	Ophiomyia sp.
1558	Arthropoda	EF104668	118582638	Tropicomyia theae
1559	Arthropoda	EF104669	118582640	Amauromyza flavifrons
1560	Arthropoda	EF104671	118582644	Amauromyza pleuralis
1561	Arthropoda	EF104672	118582646	Aulagromyza discrepans
1562	Arthropoda	EF104673	118582648	Aulagromyza luteoscutellata
1563	Arthropoda	EF104675	118582652	Aulagromyza orbitalis
1564	Arthropoda	EF104676	118582654	Aulagromyza tridentata
1565	Arthropoda	EF104677	118582656	Calycomyza flavinotum
1566	Arthropoda	EF104679	118582660	Calycomyza lantanae
1567	Arthropoda	EF104680	118582662	Calycomyza majuscula
1568	Arthropoda	EF104681	118582664	Calycomyza malvae
1569	Arthropoda	EF104682	118582666	Calycomyza solidaginis
1570	Arthropoda	EF104683	118582668	Cerodontha angulata
1571	Arthropoda	EF104685	118582672	Cerodontha capitata
1572	Arthropoda	EF104686	118582674	Cerodontha dorsalis
1573	Arthropoda	EF104688	118582678	Cerodontha flavocingulata
1574	Arthropoda	EF104689	118582680	Cerodontha incisa
1575	Arthropoda	EF104691	118582684	Chromatomyia aprilina
1576	Arthropoda	EF104692	118582686	Chromatomyia fuscula
1577	Arthropoda	EF104693	118582688	Chromatomyia lactuca
1578	Arthropoda	EF104694	118582690	Chromatomyia syngenesiae
1579	Arthropoda	EF104695	118582692	Chromatomyia scolopendri
1580	Arthropoda	EF104696	118582694	Phytomyza spinaciae
1581	Arthropoda	EF104698	118582698	Gymnophytomyza heteroneura
1582	Arthropoda	EF104701	118582704	Liriomyza chinensis
1583	Arthropoda	EF104702	118582706	Liriomyza fricki
1584	Arthropoda	EF104704	118582710	Liriomyza philadelphivora
1585	Arthropoda	EF104705	118582712	Liriomyza trifoliearum
1586	Arthropoda	EF104706	118582714	Metopomyza scutellata
1587	Arthropoda	EF104707	118582716	Metopomyza flavonotata
1588	Arthropoda	EF104708	118582718	Napomyza cichorii
1589	Arthropoda	EF104709	118582720	Phytomyza costata
1590	Arthropoda	EF104710	118582722	Napomyza lateralis
1591	Arthropoda	EF104711	118582724	Napomyza montanoides
1592	Arthropoda	EF104712	118582726	Napomyza plumea
1593	Arthropoda	EF104713	118582728	Napomyza sp.
1594	Arthropoda	EF104714	118582730	Nemorimyza posticata
1595	Arthropoda	EF104715	118582732	Nemorimyza maculosa
1596	Arthropoda	EF104716	118582734	Phytobia betulae
1597	Arthropoda	EF104717	118582736	Phytobia setosa
1598	Arthropoda	EF104718	118582738	Phytobia sp.
1599	Arthropoda	EF104719	118582740	Phytoliriomyza arctica
1600	Arthropoda	EF104721	118582744	Phytoliriomyza melampyga
1601	Arthropoda	EF104722	118582746	Phytoliriomyza robiniae
1602	Arthropoda	EF104723	118582748	Phytoliriomyza sp.
1603	Arthropoda	EF104724	118582750	Phytomyza aquilegiana
1604	Arthropoda	EF104725	118582752	Phytomyza aquilegivora
1605	Arthropoda	EF104730	118582762	Phytomyza evanescens
1606	Arthropoda	EF104731	118582764	Pseudonapomyza sp.
1607	Arthropoda	EF104732	118582766	Pseudonapomyza lacteipennis
1608	Arthropoda	EF104734	118582770	Odinia sp.
1609	Arthropoda	EF127451	119167445	Palpada ruficeps
1610	Arthropoda	EF126440	119655406	Papilio canadensis
1611	Arthropoda	EF126457	119655457	Papilio glaucus
1612	Arthropoda	EF126475	119655511	Papilio multicaudatus
1613	Arthropoda	AB250208	121582195	Wagnerinus frugivorus
1614	Arthropoda	EF208087	121592274	Nezara viridula
1615	Arthropoda	EF373911	124054956	Anabrus simplex
1616	Arthropoda	EF206317	124388112	Reticulitermes flavipes
1617	Arthropoda	EF206318	124388126	Reticulitermes virginicus
1618	Arthropoda	EF206320	124388154	Reticulitermes hageni
1619	Arthropoda	EF437157	126098600	Oxya chinensis
1620	Arthropoda	EF405926	126165364	Sarcophaga javanica
1621	Arthropoda	EF405943	126165415	Sarcophaga inextricata
1622	Arthropoda	EF405945	126165421	Sarcophaga saprianovae
1623	Arthropoda	EF405947	126165427	Sarcophaga kempi
1624	Arthropoda	EF405949	126165433	Sarcophaga princeps
1625	Arthropoda	EF405950	126165436	Sarcophaga dumoga
1626	Arthropoda	EF405951	126165439	Sarcophaga aureolata
1627	Arthropoda	EF189664	127951351	Branchinella occidentalis
1628	Arthropoda	EF189667	127951357	Eulimnadia braueriana
1629	Arthropoda	EF189673	127951369	Lynceus tatei
1630	Arthropoda	EF189675	127951373	Pseudochydorus globosus
1631	Arthropoda	EF189678	127951379	Triops cancriformis
1632	Arthropoda	EF445956	130750940	Profenusa thomsoni
1633	Arthropoda	EF136418	131570962	Polistes apachus
1634	Arthropoda	EF136430	131570986	Polistes cinerascens
1635	Arthropoda	EF136434	131570994	Polistes dominulus
1636	Arthropoda	EF136448	131571022	Polistes nimpha
1637	Arthropoda	EF136453	131571032	Polistes poeyi
1638	Arthropoda	EF136457	131571040	Polistes snelleni
1639	Arthropoda	EF136459	131571044	Polistes tenebricosus
1640	Arthropoda	EF118288	133722289	Sitona discoideus
1641	Arthropoda	EF102902	133817761	Parides bunichus
1642	Arthropoda	EF102903	133817763	Parides burchellanus
1643	Arthropoda	AB267275	138997011	Rhagophthalmus ohbai
1644	Arthropoda	EF494670	144687084	Phytomyza rufipes
1645	Arthropoda	DQ838029	145308088	Paramelitidae sp.
1646	Arthropoda	EF493929	145308571	Anthanassa frisia
1647	Arthropoda	EF493933	145308579	Eresia ithomioides
1648	Arthropoda	EF493938	145308589	Eresia lansdorfi
1649	Arthropoda	EF493944	145308601	Eresia nauplius
1650	Arthropoda	EF493945	145308603	Eresia polina
1651	Arthropoda	EF493949	145308611	Ortilia ithra
1652	Arthropoda	EF493950	145308613	Ortilia gentina
1653	Arthropoda	EF493952	145308617	Ortilia orticas
1654	Arthropoda	EF493955	145308623	Phyciodes tharos
1655	Arthropoda	EF493956	145308625	Phystis simois
1656	Arthropoda	EF493965	145308643	Tegosa selene
1657	Arthropoda	EF493972	145308657	Ortilia liriope
1658	Arthropoda	DQ390079	145413624	Pentapycnon charcoti
1659	Arthropoda	EF576853	146142529	Symphylella sp.
1660	Arthropoda	EF583824	146221819	Ruspolia dubia
1661	Arthropoda	EF207430	146771477	Lipolexis oregmae
1662	Arthropoda	EF560650	148373529	Exopalaemon carinicauda
1663	Arthropoda	EF615592	148373663	Artemia sinica
1664	Arthropoda	EF523481	148633573	Eteoneus angulatus
1665	Arthropoda	EF457733	148840351	Colias erate
1666	Arthropoda	EF457737	148840359	Colias croceus
1667	Arthropoda	EF457739	148840363	Colias hyperborea
1668	Arthropoda	EF457740	148840365	Colias hyale
1669	Arthropoda	EF457741	148840367	Colias electo
1670	Arthropoda	EF649109	149348919	Bembidion californicum
1671	Arthropoda	EF649111	149348921	Bembidion balli
1672	Arthropoda	EF649112	149348922	Bembidion bifossulatum
1673	Arthropoda	EF649113	149348923	Bembidion bowditchii
1674	Arthropoda	EF649114	149348924	Bembidion cheyennense
1675	Arthropoda	EF649115	149348925	Bembidion confusum
1676	Arthropoda	EF649116	149348926	Bembidion coxendix
1677	Arthropoda	EF649117	149348927	Bembidion americanum
1678	Arthropoda	EF649118	149348928	Bembidion lapponicum
1679	Arthropoda	EF649138	149348948	Bembidion antiquum
1680	Arthropoda	EF649150	149348960	Bembidion arenobilis
1681	Arthropoda	EF649177	149348987	Bembidion bellorum
1682	Arthropoda	EF649203	149349013	Bembidion chalceum
1683	Arthropoda	EF649270	149349080	Bembidion honestum
1684	Arthropoda	EF649282	149349092	Bembidion integrum
1685	Arthropoda	EF649339	149349149	Bembidion louisella
1686	Arthropoda	EF649349	149349159	Bembidion rufotinctum
1687	Arthropoda	EF649374	149349184	Bembidion rothfelsi
1688	Arthropoda	EF450122	149364114	Hylobius abietis
1689	Arthropoda	EF450123	149364116	Hylobius transversovittatus
1690	Arthropoda	AM709821	149845756	Heliconius elevatus
1691	Arthropoda	EF473786	151176387	Parnassius apollonius
1692	Arthropoda	EF473801	151176417	Parnassius stubbendorfii
1693	Arthropoda	EF473819	151176453	Parnassius hannyngtoni
1694	Arthropoda	EF473828	151176471	Luehdorfia japonica
1695	Arthropoda	EF473829	151176473	Hypermnestra helios
1696	Arthropoda	EF473831	151176477	Luehdorfia puziloi
1697	Arthropoda	EF473832	151176479	Zerynthia rumina
1698	Arthropoda	EU024653	152031222	Polistes sp.
1699	Arthropoda	AK281045	153902974	Gryllus bimaculatus
1700	Arthropoda	EU016193	154100242	Trigoniophthalmus alternatus
1701	Arthropoda	EU009290	154100350	Photuris lucicrescens
1702	Arthropoda	EU009295	154100360	Pollaclassis bifaria
1703	Arthropoda	EU009296	154100362	Pyractomena borealis
1704	Arthropoda	EU009298	154100366	Photinus australis
1705	Arthropoda	EU009299	154100368	Ellychnia corrusca
1706	Arthropoda	EU009300	154100370	Pyropyga decipiens
1707	Arthropoda	EU009301	154100372	Microphotus angustus
1708	Arthropoda	EU009303	154100376	Pterotus obscuripennis
1709	Arthropoda	EU009305	154100380	Pleotomodes needhami
1710	Arthropoda	EU009306	154100382	Photinus floridanus
1711	Arthropoda	EU009307	154100384	Pyractomena angulata
1712	Arthropoda	EU009309	154100388	Pyractomena palustris
1713	Arthropoda	EU009310	154100390	Photuris quadrifulgens
1714	Arthropoda	EU009311	154100392	Phausis reticulata
1715	Arthropoda	EU009312	154100394	Photinus punctulatus
1716	Arthropoda	EU009313	154100396	Photinus pyralis
1717	Arthropoda	EU009314	154100398	Micronaspis floridana
1718	Arthropoda	EU009315	154100400	Photinus tanytoxis
1719	Arthropoda	EU009322	154100414	Aspisoma species
1720	Arthropoda	EU084035	154940879	Atelura formicaria
1721	Arthropoda	EF608459	154968298	Parnassius smintheus
1722	Arthropoda	EU053287	155968141	Junonia almana
1723	Arthropoda	EU053290	155968147	Junonia ansorgei
1724	Arthropoda	EU053294	155968155	Junonia atlites
1725	Arthropoda	EU053297	155968161	Junonia evarete
1726	Arthropoda	EU053304	155968175	Junonia hierta
1727	Arthropoda	EU053311	155968189	Junonia lemonias
1728	Arthropoda	EU053316	155968199	Junonia terea
1729	Arthropoda	EU053319	155968205	Junonia westermanni
1730	Arthropoda	EU053321	155968209	Junonia villida
1731	Arthropoda	EU053399	155968213	Yoma sabina
1732	Arthropoda	EU137664	157102087	Deracantha onos
1733	Arthropoda	EF383796	157168708	Mantis religiosa
1734	Arthropoda	EF383797	157168710	Gongylus gongylodes
1735	Arthropoda	EF383798	157168712	Orthodera novaezealandiae
1736	Arthropoda	EF383799	157168714	Mantoida schraderi
1737	Arthropoda	EF383800	157168716	Hymenopus coronatus
1738	Arthropoda	EF383801	157168718	Phyllocrania paradoxa
1739	Arthropoda	EF383802	157168720	Archimantis sobrina
1740	Arthropoda	EF383803	157168722	Vates pectinacornis
1741	Arthropoda	EF383804	157168724	Sphodromantis lineola
1742	Arthropoda	EF383805	157168726	Choeradodis rhombicollis
1743	Arthropoda	EF383806	157168728	Rhombodera stalii
1744	Arthropoda	EF383807	157168730	Tamolanica tamolana
1745	Arthropoda	EF383808	157168732	Paraoxypilus tasmaniensis
1746	Arthropoda	EF383809	157168734	Stagmomantis carolina
1747	Arthropoda	EF383810	157168736	Tenodera costalis
1748	Arthropoda	EF383811	157168737	Phyllovates chlorophaea
1749	Arthropoda	EF383812	157168739	Stagmomantis limbata
1750	Arthropoda	EF383814	157168743	Stenomantis novaeguineae
1751	Arthropoda	EF383816	157168747	Bolbena maraisi
1752	Arthropoda	EF383817	157168749	Hierodula schultzei
1753	Arthropoda	EF383818	157168751	Litaneutria minor
1754	Arthropoda	EF383819	157168753	Tylomantis sp.
1755	Arthropoda	EF383821	157168757	Chloromantis rhombica
1756	Arthropoda	EF383822	157168759	Neomantis hyalina
1757	Arthropoda	EF383823	157168761	Cliomantis obscura
1758	Arthropoda	EF383825	157168765	Oligonicella scudderi
1759	Arthropoda	EF383826	157168767	Thesprotia graminis
1760	Arthropoda	EF383827	157168769	Orthoderella ornata
1761	Arthropoda	EF383829	157168773	Statilia maculata
1762	Arthropoda	EF383831	157168777	Schizocephala bicornis
1763	Arthropoda	EF383834	157168783	Humbertiella similis
1764	Arthropoda	EF383835	157168785	Hapalopeza nilgirica
1765	Arthropoda	EF383837	157168789	Creobroter apicalis
1766	Arthropoda	EF383838	157168791	Eomantis guttatipennis
1767	Arthropoda	EF383839	157168793	Acromantis insularis
1768	Arthropoda	EF383840	157168795	Phyllothelys westwoodi
1769	Arthropoda	EF383842	157168799	Euchomenella sp.
1770	Arthropoda	EF383843	157168801	Acromantis montana
1771	Arthropoda	EF383844	157168803	Amantis biroi
1772	Arthropoda	EF383845	157168805	Austrovates variegata
1773	Arthropoda	EF383846	157168807	Thrinaconyx fumosus
1774	Arthropoda	EF383847	157168809	Didymocorypha lanceolata
1775	Arthropoda	EF383848	157168811	Dysaules himalayanus
1776	Arthropoda	EF383849	157168813	Stenotoxodera porioni
1777	Arthropoda	EF383850	157168815	Tropidomantis sp.
1778	Arthropoda	EF383851	157168817	Gonypeta borneana
1779	Arthropoda	EF383852	157168819	Gildella suavis
1780	Arthropoda	EF383853	157168821	Xanthomantis sp.
1781	Arthropoda	EF383854	157168823	Phyllothelys sp.
1782	Arthropoda	EF383855	157168825	Citharomantis falcata
1783	Arthropoda	EF383857	157168829	Sceptuchus simplex
1784	Arthropoda	EF383858	157168831	Rhomantis sp.
1785	Arthropoda	EF383860	157168835	Acontista sp.
1786	Arthropoda	EF383862	157168839	Pseudomiopteryx sp.
1787	Arthropoda	EF383864	157168843	Angela sp.
1788	Arthropoda	EF383865	157168845	Thesprotiella sp.
1789	Arthropoda	EF383866	157168847	Eumusonia livida
1790	Arthropoda	EF383867	157168849	Brunneria sp.
1791	Arthropoda	EF383868	157168851	Choeradodis stalii
1792	Arthropoda	EF383869	157168853	Empusa guttula
1793	Arthropoda	EF383870	157168855	Popa spurca
1794	Arthropoda	EF383871	157168857	Coptopteryx sp.
1795	Arthropoda	EF383873	157168861	Macromantis nicaraguae
1796	Arthropoda	EF383874	157168863	Metilia brunnerii
1797	Arthropoda	EF383875	157168865	Antemna rapax
1798	Arthropoda	EF383876	157168867	Carrikerella sp.
1799	Arthropoda	EF383878	157168871	Oromantis sp.
1800	Arthropoda	EF383880	157168875	Otomantis sp.
1801	Arthropoda	EF383881	157168877	Taumantis ehrmannii
1802	Arthropoda	EF383884	157168883	Deroplatys sp.
1803	Arthropoda	EF383886	157168887	Sibylla pretiosa
1804	Arthropoda	EF383887	157168889	Idolomorpha dentifrons
1805	Arthropoda	EF383888	157168891	Raptrix perspicua
1806	Arthropoda	EF383889	157168893	Cardioptera squalodon
1807	Arthropoda	EF383891	157168897	Entelloptera saussurei
1808	Arthropoda	EF383892	157168899	Nothogalepsus planivertex
1809	Arthropoda	EF383894	157168903	Idolomantis diabolica
1810	Arthropoda	EF383895	157168905	Iris oratoria
1811	Arthropoda	EF383896	157168907	Parasphendale sp.
1812	Arthropoda	EF383897	157168909	Dystactula grisea
1813	Arthropoda	EF383898	157168911	Oxyophthalma sp.
1814	Arthropoda	EF383899	157168913	Ceratomantis sp.
1815	Arthropoda	EF383900	157168915	Oxypilus nasutus
1816	Arthropoda	EF383902	157168919	Eomantis iridipennis
1817	Arthropoda	EF383903	157168921	Gimantis assamica
1818	Arthropoda	EF383906	157168927	Ligaria sp.
1819	Arthropoda	EF383907	157168929	Hagiomantis superba
1820	Arthropoda	EF383908	157168931	Bantia sp.
1821	Arthropoda	EF383910	157168935	Stenophylla lobivertex
1822	Arthropoda	EF383912	157168939	Pyrgomantis jonesi
1823	Arthropoda	EF383913	157168941	Chrysomantis cachani
1824	Arthropoda	EF383914	157168943	Sibylla operosa
1825	Arthropoda	EF383915	157168945	Panurgica fratercula
1826	Arthropoda	EF383916	157168947	Miomantis aurea
1827	Arthropoda	EF383917	157168949	Congoharpax aberrans
1828	Arthropoda	EF383918	157168951	Theopompella chopardi
1829	Arthropoda	EF383919	157168953	Pseudocreobotra occellata
1830	Arthropoda	EF383920	157168955	Chloroharpax modesta
1831	Arthropoda	EF383921	157168957	Stenopyga ziela
1832	Arthropoda	EF383922	157168959	Plistospilota guineensis
1833	Arthropoda	EF383923	157168961	Tarachina occidentalis
1834	Arthropoda	EF383925	157168965	Caudatoscelis marmorata
1835	Arthropoda	EF383926	157168967	Anasigerpes bifasciata
1836	Arthropoda	EF383927	157168969	Dactylopteryx flexuosa
1837	Arthropoda	EF383928	157168971	Paragalepsus toganus
1838	Arthropoda	EF383929	157168973	Nilomantis edmundsi
1839	Arthropoda	EF383930	157168975	Prohierodula ornatipennis
1840	Arthropoda	EF383931	157168977	Calofulcinia sp.
1841	Arthropoda	EF383933	157168981	Anaxarcha intermedia
1842	Arthropoda	EF383934	157168983	Galepsus sp.
1843	Arthropoda	EF383935	157168985	Ligariella gracilis
1844	Arthropoda	EF383936	157168987	Parathespis humbertiana
1845	Arthropoda	EF383939	157168993	Galinthias amoena
1846	Arthropoda	EF383940	157168995	Microphotina sp.
1847	Arthropoda	EF383943	157169001	Sphodropoda sp.
1848	Arthropoda	EF383944	157169003	Omomantis sp.
1849	Arthropoda	EF383945	157169005	Danuria thunbergi
1850	Arthropoda	EF383946	157169007	Oxypiloidea subcornuta
1851	Arthropoda	AB360979	157279563	Culicoides oxystoma
1852	Arthropoda	AB361000	157279633	Culicoides dubius
1853	Arthropoda	EF569988	157419801	Drosophila atrata
1854	Arthropoda	EF569989	157419803	Drosophila bandeirantorum
1855	Arthropoda	EF569990	157419805	Drosophila bifilum
1856	Arthropoda	EF569991	157419807	Drosophila cardini
1857	Arthropoda	EF569993	157419811	Drosophila cuaso
1858	Arthropoda	EF569994	157419813	Drosophila frotapessoai
1859	Arthropoda	EF569995	157419815	Drosophila griseolineata
1860	Arthropoda	EF569997	157419819	Drosophila guaru
1861	Arthropoda	EF569999	157419823	Drosophila medioimpressa
1862	Arthropoda	EF570000	157419825	Drosophila mediopicta
1863	Arthropoda	EF570002	157419829	Drosophila mediosignata
1864	Arthropoda	EF570003	157419831	Drosophila mediostriata
1865	Arthropoda	EF570004	157419833	Drosophila metzii
1866	Arthropoda	EF570005	157419835	Drosophila nappae
1867	Arthropoda	EF570007	157419839	Drosophila neoguaramunu
1868	Arthropoda	EF570008	157419841	Drosophila nigricincta
1869	Arthropoda	EF570009	157419843	Drosophila ornatifrons
1870	Arthropoda	EF570011	157419847	Drosophila pallidipennis
1871	Arthropoda	EF570012	157419849	Drosophila paraguayensis
1872	Arthropoda	EF570013	157419851	Drosophila paramediostriata
1873	Arthropoda	EF570015	157419855	Drosophila roehrae
1874	Arthropoda	EF570016	157419857	Drosophila schildi
1875	Arthropoda	EF570018	157419861	Drosophila sticta
1876	Arthropoda	EF570022	157419869	Drosophila setula
1877	Arthropoda	EF570023	157419871	Drosophila tripunctata
1878	Arthropoda	EU005052	157741059	Atya innocous
1879	Arthropoda	EU005075	157741105	Atya lanipes
1880	Arthropoda	EU068962	157841537	Hypoleria sarepta
1881	Arthropoda	EU068968	157841549	Napeogenes achaea
1882	Arthropoda	EU068973	157841559	Pteronymia primula
1883	Arthropoda	EU068974	157841947	Methona curvifascia
1884	Arthropoda	EU068980	157841965	Forbestra equicola
1885	Arthropoda	EU069008	157842049	Napeogenes aethra
1886	Arthropoda	EU069023	157842094	Aeria eurimedia
1887	Arthropoda	EU069025	157842100	Brevioleria seba
1888	Arthropoda	EU069036	157842133	Episcada sulphurea
1889	Arthropoda	EU069042	157842151	Godyris zavaleta
1890	Arthropoda	EU069043	157842154	Heterosais nephele
1891	Arthropoda	EU069055	157842190	Hypothyris euclea
1892	Arthropoda	EU069056	157842193	Hypothyris fluonia
1893	Arthropoda	EU069067	157842226	Ithomia amarilla
1894	Arthropoda	EU069079	157842262	Methona confusa
1895	Arthropoda	EU069082	157842271	Methona grandior
1896	Arthropoda	EU069105	157842340	Pteronymia sao
1897	Arthropoda	EU069108	157842349	Pteronymia vestilla
1898	Arthropoda	AM600684	157887728	Phyllodromica subaptera
1899	Arthropoda	AM600690	157887740	Phyllodromica iberica
1900	Arthropoda	AM600692	157887744	Phyllodromica quadracantha
1901	Arthropoda	EU029161	158120699	Chorthippus chinensis
1902	Arthropoda	EU183542	158142487	Bothriometopus macrocnemis
1903	Arthropoda	EF989646	158324567	Cilicaea sp.
1904	Arthropoda	EF989679	158324627	Phronima sedentaria
1905	Arthropoda	EF989680	158324629	Phronima bucephala
1906	Arthropoda	EF989681	158324631	Caprellidae sp.
1907	Arthropoda	EF989682	158324633	Jassa slatteryi
1908	Arthropoda	EF989684	158324636	Lestrigonus schizogeneios
1909	Arthropoda	EF989685	158324638	Hyperioides longipes
1910	Arthropoda	EF989686	158324640	Hyperietta parviceps
1911	Arthropoda	EF989687	158324642	Vibilia propinqua
1912	Arthropoda	EF989688	158324644	Vibilia viatrix
1913	Arthropoda	EF989689	158324646	Vibilia antartica
1914	Arthropoda	EF989690	158324648	Cyllopus magellanicus
1915	Arthropoda	EF989693	158324654	Lanceola loveni
1916	Arthropoda	EF989694	158324655	Scypholanceola aestiva
1917	Arthropoda	EF989698	158324661	Mimonectes loveni
1918	Arthropoda	EF989700	158324664	Acanthoscina acanthodes
1919	Arthropoda	EF989701	158324666	Synopia sp.
1920	Arthropoda	EF989702	158324668	Cyphocaris sp.
1921	Arthropoda	EF989704	158324671	Rhachotropis sp.
1922	Arthropoda	EF989705	158324673	Monoculodes sp.
1923	Arthropoda	EF989706	158324675	Gammaridae sp.
1924	Arthropoda	EF989708	158324678	Orchestia cavimana
1925	Arthropoda	EF989709	158324680	Parhyale hawaiensis
1926	Arthropoda	EF989710	158324682	Stenothoidae sp.
1927	Arthropoda	EF518305	158518696	Pheidole absurda
1928	Arthropoda	EF518309	158518704	Pheidole ampla
1929	Arthropoda	EF518312	158518710	Pheidole astur
1930	Arthropoda	EF518313	158518712	Pheidole barbata
1931	Arthropoda	EF518315	158518716	Pheidole biconstricta
1932	Arthropoda	EF518316	158518718	Pheidole bilimeki
1933	Arthropoda	EF518318	158518722	Pheidole boltoni
1934	Arthropoda	EF518321	158518728	Pheidole californica
1935	Arthropoda	EF518323	158518732	Pheidole casta
1936	Arthropoda	EF518325	158518736	Pheidole cephalica
1937	Arthropoda	EF518328	158518742	Pheidole clementensis
1938	Arthropoda	EF518331	158518748	Pheidole cockerelli
1939	Arthropoda	EF518334	158518754	Pheidole comata
1940	Arthropoda	EF518335	158518756	Pheidole constipata
1941	Arthropoda	EF518336	158518758	Pheidole cramptoni
1942	Arthropoda	EF518339	158518764	Pheidole desertorum
1943	Arthropoda	EF518341	158518768	Pheidole diversipilosa
1944	Arthropoda	EF518343	158518772	Pheidole dugasi
1945	Arthropoda	EF518344	158518774	Pheidole erratilis
1946	Arthropoda	EF518346	158518778	Pheidole fiorii
1947	Arthropoda	EF518349	158518784	Pheidole floridana
1948	Arthropoda	EF518350	158518786	Pheidole gatesi
1949	Arthropoda	EF518351	158518788	Pheidole gilvescens
1950	Arthropoda	EF518352	158518790	Pheidole harlequina
1951	Arthropoda	EF518353	158518792	Pheidole hoplitica
1952	Arthropoda	EF518355	158518796	Pheidole indagatrix
1953	Arthropoda	EF518356	158518798	Pheidole indistincta
1954	Arthropoda	EF518357	158518800	Pheidole innupta
1955	Arthropoda	EF518360	158518806	Pheidole juniperae
1956	Arthropoda	EF518361	158518808	Pheidole laselva
1957	Arthropoda	EF518362	158518810	Pheidole laticornis
1958	Arthropoda	EF518364	158518814	Pheidole macrops
1959	Arthropoda	EF518367	158518820	Pheidole metallescens
1960	Arthropoda	EF518368	158518822	Pheidole micula
1961	Arthropoda	EF518370	158518826	Pheidole minutula
1962	Arthropoda	EF518371	158518828	Pheidole moerens
1963	Arthropoda	EF518372	158518830	Pheidole morrisi
1964	Arthropoda	EF518373	158518832	Pheidole nitella
1965	Arthropoda	EF518374	158518834	Pheidole nitidicollis
1966	Arthropoda	EF518375	158518836	Pheidole noda
1967	Arthropoda	EF518376	158518838	Pheidole obscurithorax
1968	Arthropoda	EF518377	158518840	Pheidole obtusospinosa
1969	Arthropoda	EF518379	158518844	Pheidole oceanica
1970	Arthropoda	EF518382	158518850	Pheidole pelor
1971	Arthropoda	EF518383	158518852	Pheidole perpilosa
1972	Arthropoda	EF518386	158518858	Pheidole polymorpha
1973	Arthropoda	EF518388	158518862	Pheidole portalensis
1974	Arthropoda	EF518390	158518866	Pheidole protea
1975	Arthropoda	EF518393	158518872	Pheidole quadricuspis
1976	Arthropoda	EF518394	158518874	Pheidole rhea
1977	Arthropoda	EF518396	158518878	Pheidole rhinoceros
1978	Arthropoda	EF518397	158518880	Pheidole soritis
1979	Arthropoda	EF518398	158518882	Pheidole rugulosa
1980	Arthropoda	EF518399	158518884	Pheidole sciara
1981	Arthropoda	EF518400	158518886	Pheidole sciophila
1982	Arthropoda	EF518403	158518892	Pheidole sensitiva
1983	Arthropoda	EF518405	158518896	Pheidole sicaria
1984	Arthropoda	EF518406	158518898	Pheidole sitiens
1985	Arthropoda	EF518429	158518944	Pheidole striaticeps
1986	Arthropoda	EF518430	158518946	Pheidole subarmata
1987	Arthropoda	EF518431	158518948	Pheidole tandjongensis
1988	Arthropoda	EF518432	158518950	Pheidole tepicana
1989	Arthropoda	EF518434	158518954	Pheidole titanis
1990	Arthropoda	EF518435	158518956	Pheidole tristicula
1991	Arthropoda	EF518437	158518960	Pheidole tucsonica
1992	Arthropoda	EF518439	158518964	Pheidole umphreyi
1993	Arthropoda	EF518442	158518970	Pheidole violacea
1994	Arthropoda	EF518443	158518972	Pheidole vistana
1995	Arthropoda	EF518444	158518974	Pheidole xanthogaster
1996	Arthropoda	EF518445	158518976	Pheidole xerophila
1997	Arthropoda	EF518446	158518978	Pheidole yaqui
1998	Arthropoda	EF518448	158518982	Aphaenogaster sp.
1999	Arthropoda	EF518449	158518984	Messor bouvieri
[truncated: 13,565 more rows]
